# Supplementary material for: Exploiting species specificity to understand the tropism of a human-specific toxin
Source: PubMed Central journal article supplement — Sci Adv. 2020 Mar 11;6(11):eaax7515. doi: 10.1126/sciadv.aax7515 (PMC7065885; doi:10.1126/sciadv.aax7515), 2020-03-11
Supplement: aax7515_SM.pdf [file aax7515_SM.pdf]

## Supplementary Materials for

### Exploiting species specificity to understand the tropism of a human-specific toxin

K. M. Boguslawski, A. N. McKeown, C. J. Day, K. A. Lacey, K. Tam, N. Vozhilla, S. Y. Kim, M. P. Jennings,  
S. B. Koralov, N. C. Elde, V. J. Torres\*

\*Corresponding author. Email: victor.torres@nyulangone.org

Published 11 March 2020, *Sci. Adv.* **6**, eaax7515 (2020)  
DOI: 10.1126/sciadv.aax7515

#### This PDF file includes:

- Fig. S1. Purification of CD11b I-domains.
- Fig. S2. Purification and transfection of CD11b I-domain chimeras.
- Fig. S3. Characterization of the hCD11b mouse.
- Fig. S4. LukAB exhibits liver-specific tropism in vivo.
- Table S1. Signatures of positive selection on primate *ITGAM*.
- Table S2. Signatures of positive selection on rodent *ITGAM*.
- Table S3. Primate and rodent sequences analyzed for selection on *ITGAM*.
- Table S4. *S. aureus* strains used in this study.
- Table S5. Plasmids used in this study.
- Table S6. Oligonucleotides and gene sequences used in this study.
- References (38–40)

## SUPPLEMENTARY MATERIALS

### Supplemental figures

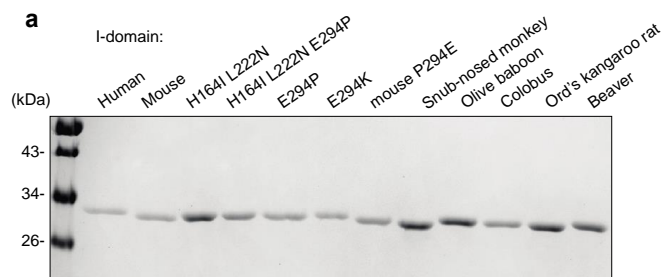

**Fig. S1. Purification of CD11b I-domains. a)** Coomassie staining of 1  $\mu$ g I-domains used in Fig. 2.

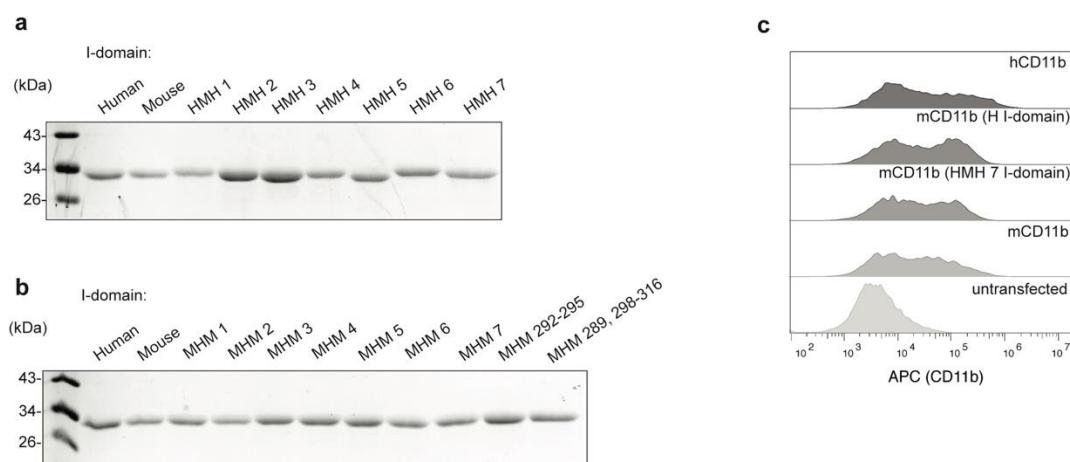

**Fig. S2. Purification and transfection of CD11b I-domain chimeras. a-b)** Coomassie staining of 1  $\mu$ g I-domains used in Fig. 3. **c)** Transfection levels of HEK293T cells transfected with CD11b and the corresponding CD18.

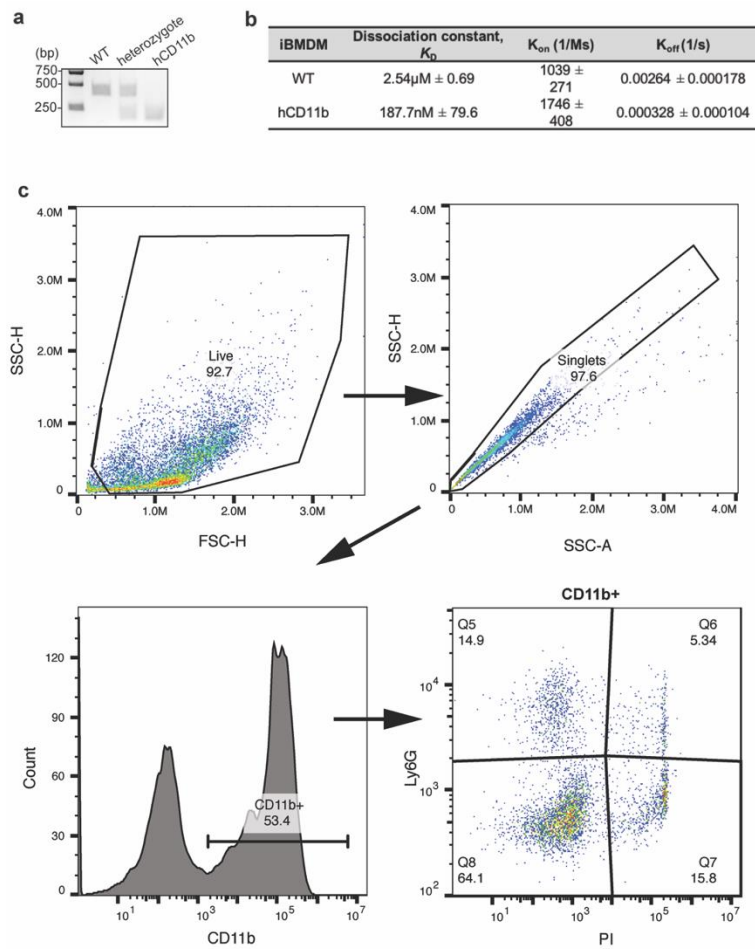

**Fig. S3. Characterization of the hCD11b mouse.** **a)** Representative gel of hCD11b mouse genotyping. DNA was isolated from tail samples, the region surrounding exon 9 was PCR amplified, and samples were digested with XhoI. **b)** SPR data of LukAB binding to WT or hCD11b iBMDMs. **c)** Representative gating strategy to determine the % propidium iodide (PI)+ PMNs (CD11b+ Ly6G+) as in Figure 4g.

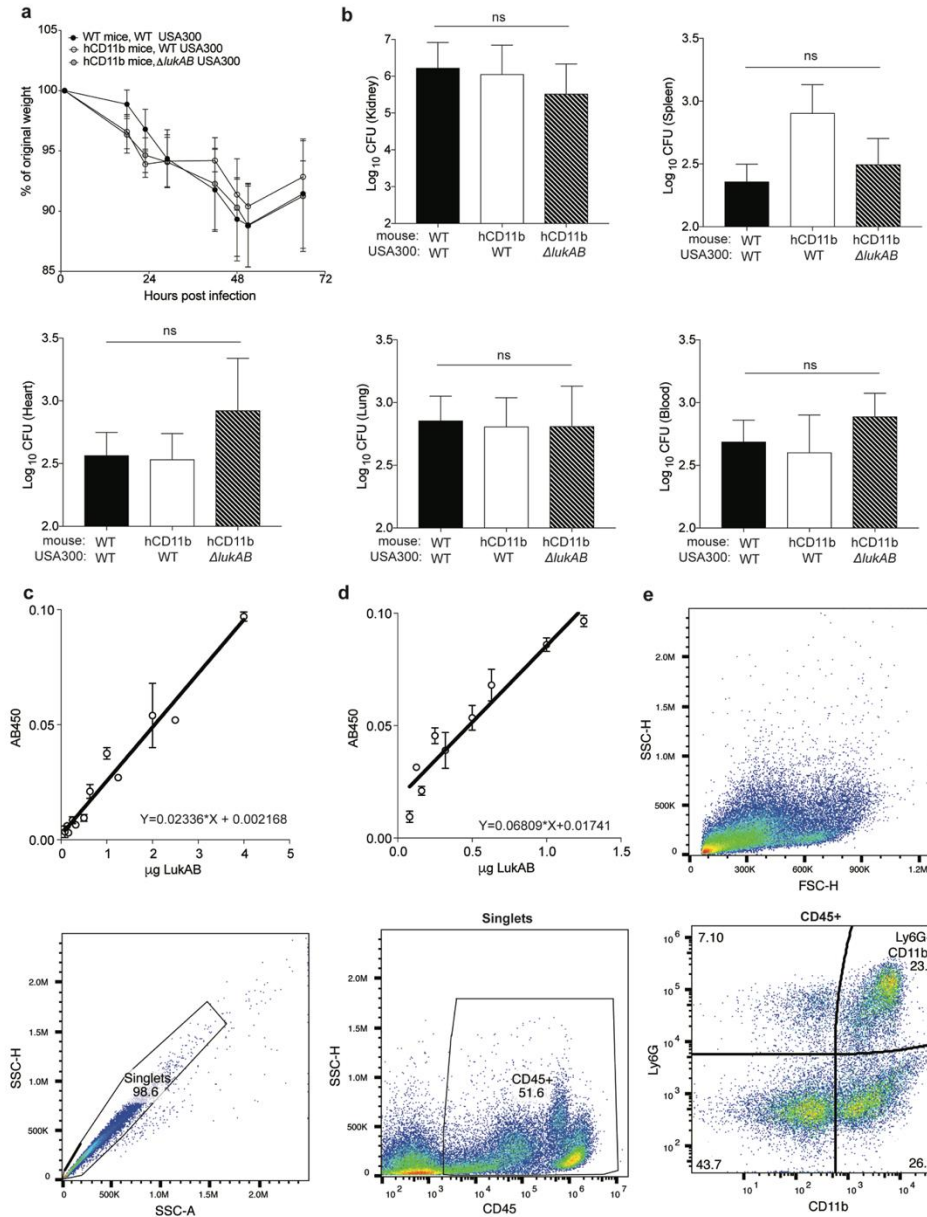

**Fig. S4. LukAB exhibits liver-specific tropism in vivo.** a-b) WT and hCD11b mice were infected IV with  $\sim 3 \times 10^6$  CFU of WT USA300 strain LAC or an isogenic  $\Delta lukAB$  LAC strain and weight loss was monitored (a). 3 days post-infection, bacterial burdens in the organs were quantified (b). c-d) Standard curves of LukAB in infected livers (a) and kidneys (b). Known quantities of LukAB was added to homogenates from mice infected with LAC  $\Delta lukAB$ , which were digested in RIPA buffer. The concentration of LukAB was measured by ELISA and linear regression was determined. Data are represented as the average of 3 independent experiments with 15 total mice per group. Statistical significance was determined by one-way ANOVA (ns=not significant). e) Representative gating strategy used to quantify PMNs (CD11b+ Ly6G+) in murine livers and kidneys as in figure 5f. The sample shown is from an infected liver.



**Table S2. Signatures of positive selection on rodent *ITGAM*.**

| <b>MEME - sites subject to episodic positive selection (on at least one branch in the phylogeny); p&lt;0.05</b> |               |           |               |                |                                                                 |                |                        |      |         |                            |                     |
|-----------------------------------------------------------------------------------------------------------------|---------------|-----------|---------------|----------------|-----------------------------------------------------------------|----------------|------------------------|------|---------|----------------------------|---------------------|
| unedited site #                                                                                                 | edited Site # | Partition | $\alpha$ (dS) | $\beta^-$ (dN) | p( $\beta^-$ ) [dN/dS]                                          | $\beta^+$ (dN) | p( $\beta^+$ ) [dN/dS] | LRT  | p-value | # branches under selection | Total branch length |
| 62                                                                                                              | 57            | 1         | 0             | 0              | 0.72                                                            | 7.49           | 0.28                   | 4.34 | 0.05    | 0                          | 3.52                |
| 68                                                                                                              | 63            | 1         | 0             | 0              | 0.8                                                             | 11.22          | 0.2                    | 9.23 | 0       | 3                          | 3.73                |
| 71                                                                                                              | 66            | 1         | 0             | 0              | 0.53                                                            | 4.28           | 0.47                   | 5.68 | 0.03    | 2                          | 3.31                |
| 77                                                                                                              | 72            | 1         | 0.57          | 0              | 0.74                                                            | 14.41          | 0.26                   | 5.59 | 0.03    | 2                          | 6.45                |
| 98                                                                                                              | 93            | 1         | 0             | 0              | 0.76                                                            | 5.63           | 0.24                   | 4.58 | 0.05    | 0                          | 2.25                |
| 163                                                                                                             | 158           | 1         | 0.56          | 0.56           | 0.89                                                            | 217.47         | 0.11                   | 6.89 | 0.01    | 1                          | 42.11               |
| 222                                                                                                             | 217           | 1         | 0             | 0              | 0.43                                                            | 5.59           | 0.57                   | 7.09 | 0.01    | 1                          | 5.32                |
| 277                                                                                                             | 272           | 1         | 0             | 0              | 0.94                                                            | 8.61           | 0.06                   | 7.03 | 0.01    | 1                          | 0.9                 |
| 294                                                                                                             | 289           | 1         | 1.74          | 0.56           | 0.87                                                            | 10000          | 0.13                   | 8.28 | 0.01    | 0                          | 2124.18             |
| 298                                                                                                             | 293           | 1         | 0             | 0              | 0                                                               | 1.97           | 1                      | 4.86 | 0.04    | 0                          | 3.26                |
| 340                                                                                                             | 335           | 1         | 0.45          | 0              | 0.82                                                            | 13.55          | 0.18                   | 6.07 | 0.02    | 3                          | 4.28                |
| 387                                                                                                             | 382           | 1         | 0             | 0              | 0.1                                                             | 1.84           | 0.9                    | 4.9  | 0.04    | 0                          | 2.75                |
| 503                                                                                                             | 497           | 1         | 0             | 0              | 0                                                               | 1.35           | 1                      | 4.55 | 0.05    | 0                          | 2.24                |
| 573                                                                                                             | 567           | 1         | 0             | 0              | 0.34                                                            | 1.81           | 0.66                   | 5.16 | 0.03    | 0                          | 1.97                |
| 641                                                                                                             | 635           | 1         | 0.56          | 0.19           | 0.95                                                            | 5344.6         | 0.05                   | 4.94 | 0.04    | 1                          | 403.69              |
| 645                                                                                                             | 639           | 1         | 0             | 0              | 0                                                               | 1.27           | 1                      | 4.92 | 0.04    | 1                          | 2.09                |
| 705                                                                                                             | 696           | 1         | 0             | 0              | 0.86                                                            | 9.75           | 0.14                   | 9.14 | 0       | 0                          | 2.18                |
| 718                                                                                                             | 709           | 1         | 0.57          | 0.57           | 0.77                                                            | 56.64          | 0.23                   | 5.04 | 0.04    | 0                          | 22.33               |
| 840                                                                                                             | 831           | 1         | 0.39          | 0              | 0.84                                                            | 31.82          | 0.16                   | 6.31 | 0.02    | 2                          | 8.67                |
| 889                                                                                                             | 874           | 1         | 0             | 0              | 0                                                               | 1.8            | 1                      | 4.77 | 0.04    | 1                          | 2.98                |
| 934                                                                                                             | 919           | 1         | 0             | 0              | 0.67                                                            | 5.41           | 0.33                   | 5.63 | 0.03    | 1                          | 2.96                |
| 1103                                                                                                            | 1088          | 1         | 0             | 0              | 0.63                                                            | 4.64           | 0.37                   | 5.48 | 0.03    | 3                          | 2.83                |
| <b>FUBAR - sites evolving under pervasive positive selection (across entire phylogeny); PP&gt;0.9</b>           |               |           |               |                |                                                                 |                |                        |      |         |                            |                     |
| unedited site #                                                                                                 | edited Site # | Partition | $\alpha$      | $\beta$        | Prob[ $\alpha < \beta$ ] (posterior prob of positive selection) |                |                        |      |         |                            |                     |
| 222                                                                                                             | 217           | 1         | 0.68          | 4.379          | 0.9306                                                          |                |                        |      |         |                            |                     |

**Table S3. Primate and rodent sequences analyzed for selection on *ITGAM*.**

| <b>Accession number</b> | <b>ID</b> | <b>Latin name</b>         | <b>Common name</b>          |
|-------------------------|-----------|---------------------------|-----------------------------|
| XM_017978882.1          | calJac    | Callithrix jacchus        | Common marmoset             |
| XM_008062063.2          | carSyr    | Carlito syrichta          | Philippine tarsier          |
| XM_017515568.1          | cebCap    | Cebus capucinus           | White-headed capuchin       |
| XM_012089958.1          | cerAty    | Cercocebus atys           | Sooty mangabey              |
| XM_007990737.1          | chlSab    | Chlorocebus sabaeus       | Green monkey                |
| XM_011933636.1          | colAng    | Colobus angolensis        | Angolan colobus             |
| XM_019012856.1          | gorGor    | Gorilla gorilla           | gorilla                     |
| NM_001145808.1          | homSap    | Homo sapiens              | human                       |
| XM_015126018.1          | macMul    | Macaca mulatta            | Rhesus macaque              |
| XM_011743478.2          | macNem    | Macaca nemestrina         | Southern pig-tailed macaque |
| XM_011982524.1          | manLeu    | Mandrillus leucophaeus    | drill                       |
| XM_003807498.3          | panPan    | Pan paniscus              | Bonobo                      |
| NM_001194934.1          | panTro    | Pan troglodytes           | Common chimpanzee           |
| XM_021931902.1          | papAnu    | Papio anubis              | Olive baboon                |
| XM_023191072.1          | pilTep    | Ptilocolobus tephrosceles | Ashy red colobus            |
| XM_024233586.1          | ponAbe    | Pongo abelii              | Sumatran orangutan          |
| XM_017869819.1          | rhiBie    | Rhinopithecus bieti       | Black snub-nosed monkey     |
| XM_010362268.1          | rhiRox    | Rhinopithecus roxellana   | Golden snub-nosed monkey    |
| XM_003930035.2          | saiBol    | Saimiri boliviensis       | Squirrel monkey             |
| XM_015491355.1          | marMar    | Marmota marmota           | Alpine marmot               |
| XM_004856245.2          | hetGla    | Heterocephalus glaber     | Naked mole-rat              |
| XM_008823789.2          | nanGal    | Nannospalax galili        | Blind mole-rat              |
| XM_004671036.1          | jacJac    | Jaculus jaculus           | Lesser Egyptian jerboa      |
| XM_005064322.3          | mesAur    | Mesocricetus auratus      | Golden hamster              |
| XM_005351336.2          | micOch    | Microtus ochrogaster      | Prairie vole                |
| NM_001082960.1          | musMus    | Mus musculus              | House mouse                 |
| XM_021167472.1          | musCar    | Mus caroli                | Ryukyu mouse                |
| XM_021206605.1          | MusPah    | Mus pahari                | Gairdner's shrewmouse       |
| XM_006230214.3          | ratNor    | Rattus norvegicus         | rat                         |
| XM_013011633.1          | dipOrd    | Dipodomys ordii           | Ord's kangaroo rat          |
| XM_020179599.1          | CasCan    | Castor canadensis         | North American beaver       |
| XM_021662027.1          | MerUng    | Meriones unguiculatus     | Mongolian gerbil            |

**Table S4. *S. aureus* strains used in this study.**

| Strain name                                                                             | Strain #  | Description                                                                                                                    | Used for                                   | Reference |
|-----------------------------------------------------------------------------------------|-----------|--------------------------------------------------------------------------------------------------------------------------------|--------------------------------------------|-----------|
| Newman                                                                                  | VJT 2.97  |                                                                                                                                | Recruiting leukocytes to peritoneal cavity | (38)      |
| Newman $\Delta\Delta\Delta$ pOS1- <i>PlukAB</i> -LukAs.s.-6xHis-CC8 LukAB               | VJT 46.28 | Newman strain lacking all the leukocidins used to produce WT LukAB                                                             | purification of LukAB                      | (35)      |
| AH-LAC USA300- <i><math>\Delta</math>lukAB hlg::tet lukED::kan lukSF::spec</i> pOS1sGFP | VJT 49.34 | AH-LAC lacking all the leukocidins, transformed with pOS1 with super GFP driven by the <i>sarA</i> promoter and <i>sod</i> RBS | phagocytosis assay                         | (39)      |
| USA300 LAC                                                                              | VJT 12.61 |                                                                                                                                | mouse infections                           | (40)      |
| USA300 LAC <i><math>\Delta</math>lukAB</i>                                              | VJT 14.26 | <i>lukAB</i> was deleted using pKOR1                                                                                           | mouse infections                           | (34)      |
| USA300 LAC <i><math>\Delta</math>lukAB</i> pOS1                                         | VJT 15.17 | LAC transformed with pOS1                                                                                                      | mouse infections                           | (34)      |
| LAC <i><math>\Delta</math>lukAB</i> pOS1- <i>lukAB</i>                                  | VJT 15.18 | LAC transformed with pOS1- <i>lukAB</i> complementation plasmid                                                                | mouse infections                           | (34)      |



**Table S5. Plasmids used in this study.**

| <b>Plasmid</b>                                       | <b>Used for</b>                                                                                            | <b>Reference/source</b> |
|------------------------------------------------------|------------------------------------------------------------------------------------------------------------|-------------------------|
| pET15b-6xHis- human CD11b I-domain-Flag              | To generate recombinant human CD11b I-domain (NP_001139280.1) with a N-terminal 6xHis tag and 3xFLAG tag.  | (12)                    |
| pET15b-6xHis- murine CD11b I-domain-Flag             | To generate recombinant murine CD11b I-domain (NP_001076429.1) with a N-terminal 6xHis tag and 3xFLAG tag. | (12)                    |
| pCMV-XL5 human CD11b                                 | HEK293T binding assay                                                                                      | OriGene (cat# SC32651)  |
| pCMV-AC human CD18                                   | HEK293T binding assay                                                                                      | OriGene (cat# SC320165) |
| pCMV-Entry mouse CD11b                               | HEK293T binding assay                                                                                      | OriGene (cat# MC223766) |
| pCMV-Entry mouse CD18                                | HEK293T binding assay                                                                                      | OriGene (cat# MC221481) |
| pCMV6-Entry mouse CD11b <sup>H-I</sup> -<br>domain   | HEK293T binding assay                                                                                      | This study              |
| pCMV6 Entry mouse<br>CD11b <sup>HMH 7</sup> I-domain | HEK293T binding assay                                                                                      | This study              |

**Table S6. Oligonucleotides and gene sequences used in this study.**

| <b>Label</b>                                    | <b>Description</b>                                                                     | <b>Sequence</b>                                         |
|-------------------------------------------------|----------------------------------------------------------------------------------------|---------------------------------------------------------|
| CD11b <sup>H-I-</sup><br>domain Vector<br>F     | To clone pCMV6-Entry mouse CD11b <sup>H-I-domain</sup> for HEK293T binding assays      | 5'-<br>CGGGAGAAGATCTTTGCGATTGAGGGCACGCAGAC<br>A-3'      |
| CD11b <sup>H-I-</sup><br>domain Vector<br>R     | To clone pCMV6-Entry mouse CD11b <sup>H-I-domain</sup> for HEK293T binding assays      | 5'-<br>CTGCCGTAGGTTGGATCCGAACAAATAGCACAATC<br>CATTTC-3' |
| CD11b <sup>H-I-</sup><br>domain Insert F        | To clone pCMV6-Entry mouse CD11b <sup>H-I-domain</sup> for HEK293T binding assays      | 5'-<br>GAATGGATTGTGCTATTTGTTCCGGATCCAACCTACG<br>GCAG-3' |
| CD11b <sup>H-I-</sup><br>domain Insert R        | To clone pCMV6-Entry mouse CD11b <sup>H-I-domain</sup> for HEK293T binding assays      | 5'-<br>TGTCTGCGTGCCCTCAATCGCAAAGATCTTCTCCCG<br>-3'      |
| CD11b <sup>HMH 7 I-</sup><br>domain Vector<br>F | To clone pCMV6 Entry mouse CD11b <sup>HMH 7 I-</sup> domain for HEK293T binding assays | 5'-ACCATTTCAGAACCAGCTTCAGGA-3'                          |
| CD11b <sup>HMH 7 I-</sup><br>domain Vector<br>R | To clone pCMV6 Entry mouse CD11b <sup>HMH 7 I-</sup> domain for HEK293T binding assays | 5'-TCTCTGAGAGCCTCTGGGAACT-3'                            |
| CD11b <sup>HMH 7 I-</sup><br>domain Insert F    | To clone pCMV6 Entry mouse CD11b <sup>HMH 7 I-</sup> domain for HEK293T binding assays | 5'-AGTTCCCAGAGGCTCTCAGAGA-3'                            |
| CD11b <sup>HMH 7 I-</sup><br>domain Insert R    | To clone pCMV6 Entry mouse CD11b <sup>HMH 7 I-</sup> domain for HEK293T binding assays | 5'-TCCTGAAGCTGGTTCTGAATGGT-3'                           |
| Exon 9 F                                        | Forward primer to amplify exon 9 of murine <i>Itgam</i>                                | 5'-AAGCTGCCTTCTGCTGAACTCT-3'                            |
| Exon 9 R                                        | Reverse primer to amplify exon 9 of murine <i>Itgam</i>                                | 5'-GCTACATGGGGCTGCTACCATC-3'                            |

Sheep I-  
domain

(Ovis aries,  
NP\_001076062.1)  
To clone into pET15b;  
N-terminal NdeI site;  
C-terminal 6-glycine  
linker, 3xFLAG, XhoI  
site

```
ATTCGCATATGGGATCCAATCTACTCCAGAAACCC  
AGGAGGATCCCAGCGGCCCTCAGAGAGTGCCCTCA  
GCAAGACAGTGACATTGCCTTTTTTGATTGATGGCTC  
TGGTAGCATCGACCCAGTAGACTTTGATCGGATGA  
AGAAGTTTGTCTCAACTGTGATGAGTTCGATTCCAA  
AAGTCCAAAACCTTGTTTCGCTCTGATGCAGTACTCG  
GATGACTTCCGGACTCACTTCACCTTCAATGGTTTC  
AAGAGAAACTCAGACCCGGAATTACTGGTGAGGCC  
AATAGGACAGCTGTTTCGGGAGGACGCACACAGCCA  
CGGGGATCCGCAAAGTAGTGAGAGAACTGTTTCAC  
AGCAGCAATGGAGCCCGGAATCATGCCCTGAAGAT  
CATGATTGTCATCACAGATGGGGAAAAATATCTCG  
ATCCTTTGGAGTATAGGGATGTCATCCCTGAAGCT  
GATAGAAAAGGGATCATTTCGCTACGTCATTGGGGT  
GGGAGATGCTTTTAAACAGTAAGAAATCTCGAAAGG  
AGCTCGATACTATTGCATCTAAGCCGCCTGCTGATC  
ACGTGTTCCAGGTGAATAACTTCGAAGCTCTGAAG  
ACCATTTCAGAACCAGCTTCAGGAAAAGATCTTTGC  
GGGAGGAGGCGGAGGAGGAGACTACAAAGACCAT  
GACGGTGATTATAAAGATCATGATATCGATTACAA  
GGATGACGATGACAAGTAACTCGAGTCGACG
```

Cow I-  
domain

(Bos Taurus,  
XP\_005224900.1)  
To clone into pET15b;  
N-terminal NdeI site;  
C-terminal 6-glycine  
linker, 3xFLAG, XhoI  
site

```
ATTCGCATATGGGATCCAATCTACTCCAGCAACCC  
AGGAGGATCCCAAGGGCCCTCAGAGGGTGCCCTGA  
GCAAGACAGTGACATTGCCTTTTTTGATTGATGGCTC  
TGGTAGCATCGACCCAGTAGACTTTGAGCGGATGA  
AGAGGTTTGTCTCAACTGTGATGAGTCAATTCCAA  
AAGTCCAAAACCTTGTTCTCTCTGATGCAGTACTCG  
GATGACTTCCAGACTCACTTCACCTTCAATGATTTTC  
AAGAGAAACCCTGTCCCAGGAATTCCTGGTGGGGCC  
AATAAGACAGCTGTTTGGGAGGACGCACACGGCCA  
CGGGGATCCGCAAAGTAGTGAGAGAACTGTTTCAC  
AGCAGCAGTGGAGCCCGGAATCATGCCATTAAGAT  
CATGATTGTCATCACAGATGGGGAAAAATATCTCG  
ATCCTTTGGAGTATAGTGATGTCATCCCTGAAGCTG  
ATAGAAAAAAGATCATTTCGCTACGTCATTGGGGTG  
GGAGATGCTTTTAGGAGTAGGAAATCTCGACAGGA  
GCTCGATACTATTGCATCTAAGCCCCCTGCTGACCA  
CGTGTTCAGGTGAATAACTTCGAAGCTCTGAAGA  
CCATTTCAGAACCAGCTTCAGGAAAAGATCTTTGCG  
GGAGGAGGCGGAGGAGGAGACTACAAAGACCATG  
ACGGTGATTATAAAGATCATGATATCGATTACAAG  
GATGACGATGACAAGTAACTCGAGTCGACG
```

---

|                          |                                                                                                                                       |                                                                                                                                                                                                                                                                                                                                                                                                                                                                                                                                                                                                                                                                                                                                                                                                                                                                                               |
|--------------------------|---------------------------------------------------------------------------------------------------------------------------------------|-----------------------------------------------------------------------------------------------------------------------------------------------------------------------------------------------------------------------------------------------------------------------------------------------------------------------------------------------------------------------------------------------------------------------------------------------------------------------------------------------------------------------------------------------------------------------------------------------------------------------------------------------------------------------------------------------------------------------------------------------------------------------------------------------------------------------------------------------------------------------------------------------|
| Chinese Hamster I-domain | (Cricetulus griseus, XP_003511044.1)<br>To clone into pET15b; N-terminal NdeI site; C-terminal 6-glycine linker, 3xFLAG, XhoI site    | <p>ATTCGCATATGGACTCCAACCTGATGAGGCCACCC<br/> CAGCAGTTCCCAGAGGCTCTCAGAGAATGTCCTCA<br/> GCAGGAGAGTGACATTGTCTTCTTGATTGATGGCTC<br/> TGGTAGCATCCACCCCAGAGACTTTCAGAAGATGA<br/> AGGAGTTTGTCTCAACTGTGATGGAGCAGTTCACA<br/> AAGTCTAAAACCTTGTCTCTTTGATGCAGTACTCT<br/> GATGAATTCCGGACTCACTTCACCTTCAATGATTTC<br/> AAGAAAAACCTAACCCAAGATCACATGTGGATTTC<br/> CATAAGGCAGCTGAATGGAATGACAAAAACGGCCT<br/> CAGGGATCCAAAAAGTAGTGAGAGAAGTGTTCAG<br/> AAAAGTAGCGGGGCCCCGGGAGAATGCTGTGAAGA<br/> TCCTAGTTGTCATCACAGATGGAGAAAAATATGGA<br/> GATCCCTTGATTATGAGGATGTCATCCCTGAGGC<br/> AGACAGAGCAAGGGTCATCCGTTATGTCATTGGGG<br/> TAGGAAATGCCTTCGCCAGTAGACAATCCCCTCGA<br/> GAGCTTGATAACCATTGCATCTAAGCCAGCTGATGA<br/> TCACGTGTTCCAAGTGGACAACCTTTGAAGCTCTGA<br/> AGACCATTGAGAACCAGCTTCAGGAAAAAATCTTT<br/> GCCGGAGGAGGCGGAGGAGGAGACTACAAAGACC<br/> ATGACGGTGATTATAAAGATCATGATATCGATTAC<br/> AAGGATGACGATGACAAGTAACTCGAGTCGACG</p> |
| Rabbit I-domain          | (Oryctolagus cuniculus, XP_002721795.1)<br>To clone into pET15b; N-terminal NdeI site; C-terminal 6-glycine linker, 3xFLAG, XhoI site | <p>ATTCGCATATGGGATCCAACCTGCTGCAGTCACCC<br/> CAGAGGGTCCCAGAGACCCTCAGAGGATGTCCTCA<br/> GCAGGAGAGTGACATTGCCTTCTTGATTGATGGCT<br/> CCGGTAGCATTGACTCAACGGACTTCCAGAGGATG<br/> AAGGAGTTTGTCTCCACCGTGATGGAGCAATTCAC<br/> GAAGTCCAATTCCCTGTTTCGCTTGATGCAGTACTC<br/> CGAAGAGTTCCGGACTCACTTTACCTTCAGTGACTT<br/> CAAAAGAAACCCCAACCCTAGAGCGCTGGTGAAGC<br/> CGATCCGACAGCTGCTTGGGAGGACGCACACGGCC<br/> ACGGGGATCCTCAAAGTCGTGACAGAGCTGTTTCA<br/> TAGCAGTAGCGGGGCCAGGGCGAACGCCCGGAAG<br/> GTCTCGTGGTGATCACGGATGGAGAGAAGTTCGG<br/> CGACACCTTGGAGTATGAGGATGTCATCCCGAGGG<br/> CAGAAAGGGAGGGCGTCATTCGCTACGTCGTTGGG<br/> GTGGGAGACGCCTTCAACAGTGAGCAAAGCCGCCA<br/> AGAGCTCAATACCATTGCGTCCAAGCCGTCTCGTG<br/> AGCACGTGTTCCGGGTGAACAACCTTCGAAGCCCTG<br/> AACACCATTGGAATCAGCTTCAGGAAAAGATCTT<br/> TGCAGGAGGAGGCGGAGGAGGAGACTACAAAGAC<br/> CATGACGGTGATTATAAAGATCATGATATCGATTA<br/> CAAGGATGACGATGACAAGTAACTCGAGTCGACG</p>  |

|              |                                                                                                                                                          |                                                                                                                                                                                                                                                                                                                                                                                                                                                                                                                                                                                                                                                                                                                                                                                                                                                                                                 |
|--------------|----------------------------------------------------------------------------------------------------------------------------------------------------------|-------------------------------------------------------------------------------------------------------------------------------------------------------------------------------------------------------------------------------------------------------------------------------------------------------------------------------------------------------------------------------------------------------------------------------------------------------------------------------------------------------------------------------------------------------------------------------------------------------------------------------------------------------------------------------------------------------------------------------------------------------------------------------------------------------------------------------------------------------------------------------------------------|
| Rat I-domain | (Rattus norvegicus,<br>GenBank:<br>EDM17198.1)<br>To clone into pET15b;<br>N-terminal NdeI site;<br>C-terminal 6-glycine<br>linker, 3xFLAG, XhoI<br>site | <p>ATTCGCATATGGGCTCCAACCTGCTGAGGAAGCCC<br/> CAGCAGTTCCCAGAGGCTCTCAGAGGATGTCCTCA<br/> GCAGGAGAGCGACATTGCCTTCTTGATTGACGGCT<br/> CCGGTAGCATCAACAGCATCGACTTTCAGAAGATG<br/> AAGGAATTTGTCTCAACTGTGATGGACCAGTTCCA<br/> AAAGTCTAAAACCTTGTTCTCTTTGATGCAGTACTC<br/> TGATGAATTCCGGACTCACTTCACCTTCAATGATTT<br/> CAAGAGAAACCCTGACCCAAAATCACATGTGAGAC<br/> CCATAAGGCAGCTGAATGGAAGGACAAAACCTGC<br/> CTCAGGGATCCGTAAAGTAGTGAGAGAAGTGTTC<br/> AGAAAATCAATGGGGCCCGGGACAATGCCGCGAA<br/> GATCCTAGTTGTCATCACAGACGGAGAAAAGTTTG<br/> GTGACCCCCTAAATTATGAGGATGTCATTCCTGAG<br/> GCAGAGGAAGCAGGGATCATTTCGCTACGTTATTGG<br/> GGTGGGAAACGCCTTCCACAAACCACAGTCCCAGCA<br/> GAGAGCTTGACACCATCGCGTCTAAGCCAGCTGGT<br/> GATCACGTGTTCCAAGTGGACAACCTTGAAGCTCT<br/> GAATACCATTTCGGAACCAGCTCCAGGAAAAGATCT<br/> TTGCAGGAGGAGGCGGAGGAGGAGACTACAAAGA<br/> CCATGACGGTGATTATAAAGATCATGATATCGATT<br/> ACAAGGATGACGATGACAAGTAACTCGAGTCGACG</p> |
| Pig I-domain | (Sus scrofa,<br>XP_020942039.1)<br>To clone into pET15b;<br>N-terminal NdeI site;<br>C-terminal 6-glycine<br>linker, 3xFLAG, XhoI<br>site                | <p>ATTCGCATATGGGATCCAACCTACATCAGCAGCCC<br/> CAGAGGGTCCCAGAGACCCTCAGAGGGTGTCTCA<br/> GCAAGAGAGTGACATTGCCTTTTTTGATTGATGGTTC<br/> CGGTAGCATCAACCGGTTAGACTTTCAGCGGATGA<br/> AGGAGTTTGTCTCCACTGTGATGGGTCAATTCCAA<br/> AAGTCCAAAACCCTGTTTGCTCTGATGCAGTACTCT<br/> GAAGACTTCTACACTCATTTACCTTCAATGATTTT<br/> AAGAGAAACCCTTCCCCAGAATTGCTGGTGAGGCC<br/> AATAAGACAGCTGCTGGGGAGGACTCACACCGCCA<br/> CGGGAATCCGCAAAGTAGTAAGAGAACTGTTTAC<br/> AGCAAGAGTGGAGCCCCGGGAGAATGCCCTTAAGAT<br/> CCTAGTTGTCATCACGGACGGAGAAAAGTTTCGGCG<br/> ATCCTTTGGGATATGAGGATGTCATCCCTGAAGCG<br/> GATAGAAAGGGCGTCATTTCGCTATGTCATCGGGGT<br/> GGGAGATGCCTTCAACAGTTGGAAATCTCGTGAGG<br/> AGCTTAATACCATTGCATCCAAGCCGTCTGGAGAT<br/> CACGTGTTCCAGGTGACTAACTTGAAGCTCTGAA<br/> GACCATTGAGAACCAGCTTCAGGAAAAGATCTTTG<br/> CGGGAGGAGGCGGAGGAGGAGACTACAAAGACCA<br/> TGACGGTGATTATAAAGATCATGATATCGATTACA<br/> AGGATGACGATGACAAGTAACTCGAGTCGACG</p>   |

---

|                        |                                                                                                                                      |                                                                                                                                                                                                                                                                                                                                                                                                                                                                                                                                                                                                                                                                                                                                                                                                                                              |
|------------------------|--------------------------------------------------------------------------------------------------------------------------------------|----------------------------------------------------------------------------------------------------------------------------------------------------------------------------------------------------------------------------------------------------------------------------------------------------------------------------------------------------------------------------------------------------------------------------------------------------------------------------------------------------------------------------------------------------------------------------------------------------------------------------------------------------------------------------------------------------------------------------------------------------------------------------------------------------------------------------------------------|
| Horse I-domain         | (Equus caballus, XP_005598796.2)<br>To clone into pET15b;<br>N-terminal NdeI site;<br>C-terminal 6-glycine linker, 3xFLAG, XhoI site | ATTCGCATATGGGATCCAACCTACGGCAGCAGCCC<br>CAGAGGTTCCCAGAAGCCCTCAGAGAGTGCCCTCA<br>GCAGGAGAGTGACATCGCCTTCTTGATTGATGGCT<br>CTGGTAGCATCTACGAGAATGACTTTCAGAAGATG<br>AAGGAGTTTGTCACAATTGTGATGAATCAATTCAA<br>AAAGTCTAAAACCTTGTCTCTTTGATGCAGTACTC<br>CGACACCTTCCAGACTCATTTACCTTCAAAGAATT<br>CGCTAACAACCCTAACCCAGGATCGCTGGTGAGAC<br>CAATAAATCAGCTGGGTGGGAGGACACACACTGCC<br>ACCGGAATCCGCAAAGTAGTGAGGGAACTGTTTCA<br>CAGCAGGAATGGAGCCCAGGAAGATGCTCTTAAGA<br>TCCTAGTTGTCATCACAGATGGAGAAAAGTTTGGT<br>GATCGCTTGGGAATACGAGGATGTCATCCCTGAGGC<br>AGACCAAGAAGGAATCATTGCTATGTCATTGGGG<br>TGGGCATTGCCTTCAGCATTGAGAAATCTCGTGAA<br>GAGCTTAACACCATTGCATCCAAGCCGGCTCGTGA<br>CCATGTGTTCCGGGTGAATAACTTTGAAGCTCTGA<br>AGACCATTGAGAATCAGCTTCAGGAAAAGATCTTT<br>GCGGGAGGAGGCGGAGGAGGAGACTACAAAGACC<br>ATGACGGTGATTATAAAGATCATGATATCGATTAC<br>AAGGATGACGATGACAAGTAACTCGAGTCGACG |
| Rhesus monkey I-domain | (Macaca mulatta, XP_014981504.1)<br>To clone into pET15b;<br>N-terminal NdeI site;<br>C-terminal 6-glycine linker, 3xFLAG, XhoI site | ATTCGCATATGGGATCCAACCTACGGCAGCAGCCC<br>CAGAAGTCCCAGGGACCCTCCGAGGGTGTCTGA<br>ACAGGACATCGCCTTCTTGATTGACGGCTCTGGTA<br>GCATCAACCCACGTGAATTTGAGCAGATGAAGGAT<br>TTTGTCTCGGTCATGATGGAGCAATTAATAAAGTC<br>CAAAACCTTGTCTCTTTGATGCAGTACTCCGAAGA<br>ATTCTGGACTACTTTACCTTCGAAGAGTTCCAGCG<br>CAAACCTAACCCGAGATCACTGGTGAACCTCAATAA<br>CGCAGCTGTATGGGCGGACACACACGGCCACGGCC<br>ATCCGCAAAGTGGTGCGAGAAGTGTAAACGTCAA<br>CCAGGGAGCCCAGGAAGATGCCCGTAAGATCCTAG<br>TTGTCATCACAGATGGAGAAAAGTTTGGCGATCCA<br>TTGGGATATGAGGACGTGATTCCTGAGGCAGACAG<br>AGAGGGAGTCATTGCTACGTCATTGGGGTGGGAG<br>ATGCCTTCCGAGTTCGAAATCCCGCCAAGAGCTT<br>AATACCATCGCATCCAAGCCACCTCGTGATCACGT<br>GTTCCAGGTGAATAACTTTGAGGCTCTGAAGACCA<br>TTCAGAAGCAGCTTCAGGAGAAGATCTTTGCGGGA<br>GGAGGCGGAGGAGGAGACTACAAAGACCATGACG<br>GTGATTATAAAGATCATGATATCGATTACAAGGAT<br>GACGATGACAAGTAACTCGAGTCGACG           |

---

---

|                       |                                                                                                                                    |                                                                                                                                                                                                                                                                                                                                                                                                                                                                                                                                                                                                                                                                                                                                                                                                                                           |
|-----------------------|------------------------------------------------------------------------------------------------------------------------------------|-------------------------------------------------------------------------------------------------------------------------------------------------------------------------------------------------------------------------------------------------------------------------------------------------------------------------------------------------------------------------------------------------------------------------------------------------------------------------------------------------------------------------------------------------------------------------------------------------------------------------------------------------------------------------------------------------------------------------------------------------------------------------------------------------------------------------------------------|
| Olive baboon I-domain | (Papio anubis, XM_021931902.1)<br>To clone into pET15b;<br>N-terminal NdeI site;<br>C-terminal 6-glycine linker, 3xFLAG, XhoI site | ATTCGCATATGGGATCCAACCTACGGCAGCAGCCC<br>CAGAAGTTCCCAGGGACCCTCCGAGGGTGTCTGA<br>ACAGGACATCGCCTTCTTGATTGACGGCTCTGGTA<br>GCATCAACCCACGTGAATTTAGCAGATGAAGGAT<br>TTTGTCTCAATCATGATGGAGCAATTAATAAAAGTC<br>CAAACCTTGTTCTCTTTGATGCAGTACTCCGAAGA<br>ATTCTGGACTCACTTTACCTTCAAAGAGTTCCAGCG<br>CAACCCTAAGCCGAGATCACTGGTGAAGTCAATAA<br>CGCAGCTGTATGGGCGGACGCACACGGCCACGGCC<br>ATCCGCAAAGTGGTACGAGAACTGTTTAAACGTCAA<br>CCAGGGAGCCCAGAAAGTATGCCCGTAAGATCCTAG<br>TTGTCATCACAGATGGAGAAAAGTTTGGCGATCCA<br>TTGGGATATGAGGACGTCATTCCGGAGGCAGACAG<br>AGAGGGAGTCATTTCGCTACGTCATTGGGGTGGGAG<br>ATGCCTTCCGCAGTTGGAAATCCCAGCAAGAGCTT<br>AATACCATCGCATCCAAGCCAGCTCGTGATCACGT<br>GTTCCAGGTGAATAACTTTGAGGCTCTGAAGACCA<br>TTCAGAACCAGCTTCAGGAGAAGATCTTTGCGGGA<br>GGAGGCGGAGGAGGAGACTACAAAGACCATGACG<br>GTGATTATAAAGATCATGATATCGATTACAAGGAT<br>GACGATGACAAGTAACTCGAGTCGACG |
|-----------------------|------------------------------------------------------------------------------------------------------------------------------------|-------------------------------------------------------------------------------------------------------------------------------------------------------------------------------------------------------------------------------------------------------------------------------------------------------------------------------------------------------------------------------------------------------------------------------------------------------------------------------------------------------------------------------------------------------------------------------------------------------------------------------------------------------------------------------------------------------------------------------------------------------------------------------------------------------------------------------------------|

|                          |                                                                                                                                          |                                                                                                                                                                                                                                                                                                                                                                                                                                                                                                                                                                                                                                                                                                                                                                                                                                             |
|--------------------------|------------------------------------------------------------------------------------------------------------------------------------------|---------------------------------------------------------------------------------------------------------------------------------------------------------------------------------------------------------------------------------------------------------------------------------------------------------------------------------------------------------------------------------------------------------------------------------------------------------------------------------------------------------------------------------------------------------------------------------------------------------------------------------------------------------------------------------------------------------------------------------------------------------------------------------------------------------------------------------------------|
| Angolan colobus I-domain | (Colobus angolensis, XM_011933636.1)<br>To clone into pET15b;<br>N-terminal NdeI site;<br>C-terminal 6-glycine linker, 3xFLAG, XhoI site | ATTCGCATATGGGATCCAACCTACGGCAGCAGCCC<br>CAGAAGTTCCCAGGGACCCTCCGAGGGTGTCTGA<br>ACAGGACATCGCCTTCTTGATTGACGGCTCTGGTA<br>GCATCAACCCACGTGAATTTAGCAGATGAAGGAG<br>TTTGTCTCGATCATGATGGAGCAATTAATAAAAGTC<br>CAAACCTTGTTCTCTTTGATGCAGTACTCTGAAGA<br>ATTCTGGACTCACTTTACCTTCAAAGAGTTCCAGGG<br>CAACCCTAACCCGAGATCACTGGTGAAGTCAATAA<br>CGCAGCTGTTTGGGCGGACACACACGGCCACGGCC<br>ATCCGCAAAGTGGTACGAGAACTGTTTAAACGTCAA<br>CCAGGGAGCCCAGAAAGAAATGCCCTTAAGATCCTGG<br>TTGTCATCACAGATGGAGAAAAGTTTGGCGATCCC<br>TTGGGATATGAGGACGTCATCCCTGAGGCAGACAG<br>AGAGGGAGTCATTTCGCTACGTCATTGGGGTGGGAG<br>ATGCCTTCCGCAGTTTGGAAATCCCAGCAAGAGCTT<br>AATACCATTGCATCCAAGCCACCTCGTGATCACGT<br>GTTCCAGGTGAATAACTTTGAGGCTCTGAAGACCA<br>TTCAGAACCAGCTTCAGGAGAAGATCTTTGCAGGA<br>GGAGGCGGAGGAGGAGACTACAAAGACCATGACG<br>GTGATTATAAAGATCATGATATCGATTACAAGGAT<br>GACGATGACAAGTAACTCGAGTCGACG |
|--------------------------|------------------------------------------------------------------------------------------------------------------------------------------|---------------------------------------------------------------------------------------------------------------------------------------------------------------------------------------------------------------------------------------------------------------------------------------------------------------------------------------------------------------------------------------------------------------------------------------------------------------------------------------------------------------------------------------------------------------------------------------------------------------------------------------------------------------------------------------------------------------------------------------------------------------------------------------------------------------------------------------------|

---

---

|                                   |                                                                                                                                        |                                                                                                                                                                                                                                                                                                                                                                                                                                                                                                                                                                                                                                                                                                                                                                                                                                            |
|-----------------------------------|----------------------------------------------------------------------------------------------------------------------------------------|--------------------------------------------------------------------------------------------------------------------------------------------------------------------------------------------------------------------------------------------------------------------------------------------------------------------------------------------------------------------------------------------------------------------------------------------------------------------------------------------------------------------------------------------------------------------------------------------------------------------------------------------------------------------------------------------------------------------------------------------------------------------------------------------------------------------------------------------|
| Golden snub-nosed monkey I-domain | (Rhinopithecus roxellan, XM_010362268.1)<br>To clone into pET15b; N-terminal NdeI site; C-terminal 6-glycine linker, 3xFLAG, XhoI site | ATTCGCATATGGGATCCAACCTACGGCAGCAGCCC<br>CAGAAGTTCCCAGGGACCCTCCGAGGGTGTCTGA<br>ACAGGACATCGCCTTCTTGATTGACGGCTCTGGTA<br>GCATCAACCCACATGAATTTAGCAGATGAAGGAG<br>TTTGTCTCGATCATGATGGAGCAATTAATAAAGTC<br>CAAAACCTTGTTCTCTTTGATGCAGTACTCCGAAGA<br>ATTCTGGACTCATTTTACCTTCAAAGAGTTCCAGGG<br>CAACCCTAACCCGAGATCACTGGTGAAGTCAATAA<br>CGCAGCTGTTTGGGCGGACACACACGGCCACGGCC<br>ATCCGCAAAGTGGTACGAGAACTGTTTAAACGTCAA<br>TCAGGGAGCCCAGAAAGAAATGCCCTTAAGATCCTGG<br>TTGTCATCACAGATGGAGAAAAGTTTGGCGATCCC<br>TTGGGATATGAGGACGTCATCCCTGAGGCAGACAG<br>AGAGGGAGTCATTTCGCTACGTCATTGGGGTGGGAG<br>ACGCCTTCCGCAGTTTCAAATCCCGCCAAGAGCTT<br>AATACCATTGCATCCAAGCCACCTCGTGATCACGT<br>GTTCCAAGTGAATAACTTTGAGGCTCTGAAGACCA<br>TTCAGAACCAGCTTCAGGAGAAGATCTTTGCAGGA<br>GGAGGCGGAGGAGGAGACTACAAAGACCATGACG<br>GTGATTATAAAGATCATGATATCGATTACAAGGAT<br>GACGATGACAAGTAACTCGAGTCGACG |
|-----------------------------------|----------------------------------------------------------------------------------------------------------------------------------------|--------------------------------------------------------------------------------------------------------------------------------------------------------------------------------------------------------------------------------------------------------------------------------------------------------------------------------------------------------------------------------------------------------------------------------------------------------------------------------------------------------------------------------------------------------------------------------------------------------------------------------------------------------------------------------------------------------------------------------------------------------------------------------------------------------------------------------------------|

|                             |                                                                                                                                  |                                                                                                                                                                                                                                                                                                                                                                                                                                                                                                                                                                                                                                                                                                                                                                                                                                                 |
|-----------------------------|----------------------------------------------------------------------------------------------------------------------------------|-------------------------------------------------------------------------------------------------------------------------------------------------------------------------------------------------------------------------------------------------------------------------------------------------------------------------------------------------------------------------------------------------------------------------------------------------------------------------------------------------------------------------------------------------------------------------------------------------------------------------------------------------------------------------------------------------------------------------------------------------------------------------------------------------------------------------------------------------|
| Ord's kangaroo rat I-domain | (Diipodomys ordii, XM_013011633.1)<br>To clone into pET15b; N-terminal NdeI site; C-terminal 6-glycine linker, 3xFLAG, XhoI site | ATTCGCATATGGGACCCAACCTTGCTACAGCAGCCT<br>GAGCGGTCCCAGAGACCCTTAGAGGATGTCCTCA<br>GCAGGAGAGTGACATTGTCTTCTTGATCGATGGTTC<br>AGGCAGCATCCGGACACATGAGTTTCAGGAGATGA<br>AGGAGTTTGTATCAACTGTGATGAACCAATTCACA<br>GAGTCCAAAACCTTGTTCTCCTTAATGCAGTACTCT<br>GAAGAGTTCTGGACTCATTTACCTTCAGCGATTTTC<br>AAGAGAAACCCGAACCCGAGGTCTCTGATAAACCC<br>AATCAAACAGCTGAGTGGTAGGACGCACACCCGCCA<br>CAGCAATCCGCAAAGTAGTAACAGAACTCTTCCAG<br>AGCTCCAATGGGGCCCGAGAGAATGCCGTGAAGAT<br>CCTAGTTGTTATCACAGATGGAGAAAAGTTTGGTG<br>ACCCCTTGGGCTATGAGCAAGTCATCCCTCAAGCT<br>GACAGAGCGGGGATCATTCGCTATGTCATTGGGGT<br>CGGGGATGCCTTCCGCAGTGAGCGGAACAGAGAA<br>GAACTTAACACCATTGCGTCCAAGCCTTCTCAGGA<br>TCATGTATTCCGGGTGAATAACTTTCAAGCTCTGAA<br>GACCATTCAGAACCAACTGCAGGAAAAGATCTTTG<br>CCGGAGGAGGCGGAGGAGGAGACTACAAAGACCA<br>TGACGGTGATTATAAAGATCATGATATCGATTACA<br>AGGATGACGATGACAAGTAACTCGAGTCGACG |
|-----------------------------|----------------------------------------------------------------------------------------------------------------------------------|-------------------------------------------------------------------------------------------------------------------------------------------------------------------------------------------------------------------------------------------------------------------------------------------------------------------------------------------------------------------------------------------------------------------------------------------------------------------------------------------------------------------------------------------------------------------------------------------------------------------------------------------------------------------------------------------------------------------------------------------------------------------------------------------------------------------------------------------------|

---



|                                    |                                                                                                                                                  |                                                                                                                                                                                                                                                                                                                                                                                                                                                                                                                                                                                                                                                                                                                                                                                                                                                                                                  |
|------------------------------------|--------------------------------------------------------------------------------------------------------------------------------------------------|--------------------------------------------------------------------------------------------------------------------------------------------------------------------------------------------------------------------------------------------------------------------------------------------------------------------------------------------------------------------------------------------------------------------------------------------------------------------------------------------------------------------------------------------------------------------------------------------------------------------------------------------------------------------------------------------------------------------------------------------------------------------------------------------------------------------------------------------------------------------------------------------------|
| N. American<br>beaver I-<br>domain | (Castor Canadensis,<br>XM_020179599.1)<br>To clone into pET15b;<br>N-terminal NdeI site;<br>C-terminal 6-glycine<br>linker, 3xFLAG, XhoI<br>site | <p> ATTCGCATATGGGATCCAACCTGCTACAGCAGCCC<br/> CAGCGGTTCCCAGGGGCCCTCAGAGGATGCCCTCG<br/> GCAGGATAGTGACATTGCTTTTTTTGATTGATGGCTC<br/> TGGTAGCATCAACGCAAATGACTTTCAGAAGATGA<br/> AGAACTTTGTCTCAACAGTGATGAACCAATTCAAA<br/> GAGTCCAAAACCTTGTCTCCTTAATGCAGTACTCT<br/> GAAGACTTCCGGACTCATTTACCTTCAGTGATTTC<br/> AAGAGAAACCCTAATCCAGAATCACTGGTCCGTCC<br/> AATAAGACAGCTGCTTGGGAGGACGCACACTGCCA<br/> CGGGCATCCGCAAAGTAGTAACAGAAGTGTCCAC<br/> CACGCCAGTGGAGCCCGAGAGAACGCTGTCAAGAT<br/> CCTAGTTGTTATCACAGATGGAGAAAAGTATGGTG<br/> ACCCCTTGGACTATGAGGATGTCATCCCGCAGGCA<br/> GACAGAGCAGGGGTCATTTCGCTATGTCATTGGGGT<br/> GGGACATGCCTTCAGTAGTGTCTCGGATCTCGCCAAG<br/> AACTAACACCATTGCATCCAAGCCACCTCGGGAC<br/> CACGTGTTCCAGGTGAATAACTTTGAAGCTCTAAA<br/> GACCATTGAGAATCAACTGCAGGAGAAGATCTTTG<br/> CCGGAGGAGGCGGAGGAGGAGACTACAAAGACCA<br/> TGACGGTGATTATAAAGATCATGATATCGATTACA<br/> AGGATGACGATGACAAGTAACTCGAGTTCGACG </p> |
| Human I-<br>domain<br>E294P        | To clone into pET15b;<br>N-terminal NdeI site;<br>C-terminal 6-glycine<br>linker, 3xFLAG, XhoI<br>site                                           | <p> TTTCATATGGGATCCAACCTACGGCAGCAGCCCCA<br/> GAAGTTCCCAGAGGCCCTCCGAGGGGTGTCCTCAAG<br/> AGGATAGTGACATTGCCTTCTTGATTGATGGCTCTG<br/> GTAGCATCATCCCACATGACTTTCGGCGGATGAAG<br/> GAGTTTGTCTCAACTGTGATGGAGCAATTAATAAAA<br/> GTCCAAAACCTTGTCTCTTTGATGCAGTACTCTGA<br/> AGAATTCCGGATTCACTTTACCTTCAAAGAGTTCCA<br/> GAACAACCCTAACCCAAGATCACTGGTGAAGCCAA<br/> TAACGCAGCTGCTTGGGCGGACACACAGGCCACG<br/> GGCATCCGCAAAGTGGTACGAGAGCTGTTTAAACAT<br/> CACCAACGGAGCCCGAAAGAATGCCTTTAAGATCC<br/> TAGTTGTCATCACGGATGGAGAAAAGTTTGGCGAT<br/> CCCTTGGGATATGAGGATGTCATCCCTGAGGCAGA<br/> CAGAGAGGGAGTCATTTCGCTACGTCATTGGGGTGG<br/> GAGATGCCTTCCGCAGTCCAAAATCCCGCCAAGAG<br/> CTTAATAACCATCGCATCCAAGCCGCTCGTGATCAC<br/> GTGTTCCAGGTGAATAACTTTGAGGCTCTGAAGAC<br/> CATTGAGAACCAGCTTCGGGAGAAGATCTTTGCGG<br/> GAGGAGGCGGAGGAGGAGACTACAAAGACCATGA<br/> CGGTGATTATAAAGATCATGATATCGATTACAAGG<br/> ATGACGATGACAAGTAACTCGAGAAA </p>     |

---

|                         |                                                                                                        |                                                                                                                                                                                                                                                                                                                                                                                                                                                                                                                                                                                                                                                                                                                                                                                                                                             |
|-------------------------|--------------------------------------------------------------------------------------------------------|---------------------------------------------------------------------------------------------------------------------------------------------------------------------------------------------------------------------------------------------------------------------------------------------------------------------------------------------------------------------------------------------------------------------------------------------------------------------------------------------------------------------------------------------------------------------------------------------------------------------------------------------------------------------------------------------------------------------------------------------------------------------------------------------------------------------------------------------|
| Human I-domain<br>E294K | To clone into pET15b;<br>N-terminal NdeI site;<br>C-terminal 6-glycine<br>linker, 3xFLAG, XhoI<br>site | TTTCATATGGGATCCAACCTACGGCAGCAGCCCCA<br>GAAGTTCCAGAGGCCCTCCGAGGGTGTCTCAAG<br>AGGATAGTGACATTGCCTTCTTGATTGATGGCTCTG<br>GTAGCATCATCCCACATGACTTTCGGCGGATGAAG<br>GAGTTTGTCTCAACTGTGATGGAGCAATTAATAAAA<br>GTCCAAAACCTTGTTCTCTTTGATGCAGTACTCTGA<br>AGAATTCCGGATTCACCTTACCTTCAAAGAGTTCCA<br>GAACAACCCTAACCCAAGATCACTGGTGAAGCCAA<br>TAACGCAGCTGCTTGGGCGGACACACACGGCCACG<br>GGCATCCGCAAAGTGGTACGAGAGCTGTTTAAACAT<br>CACCAACGGAGCCCCGAAAGAATGCCTTTAAGATCC<br>TAGTTGTCATCACGGATGGAGAAAAGTTTGGCGAT<br>CCCTTGGGATATGAGGATGTCATCCCTGAGGCAGA<br>CAGAGAGGGAGTCATTTCGCTACGTCATTGGGGTGG<br>GAGATGCCTTCCGCAGTAAAAAATCCCGCCAAGAG<br>CTTAATACCATCGCATCCAAGCCGCCTCGTGATCAC<br>GTGTTCCAGGTGAATAACTTTGAGGCTCTGAAGAC<br>CATTGAGAACCAGCTTCGGGAGAAGATCTTTGCGG<br>GAGGAGGCGGAGGAGGAGACTACAAAGACCATGA<br>CGGTGATTATAAAGATCATGATATCGATTACAAGG<br>ATGACGATGACAAGTAACTCGAGAAA |
|-------------------------|--------------------------------------------------------------------------------------------------------|---------------------------------------------------------------------------------------------------------------------------------------------------------------------------------------------------------------------------------------------------------------------------------------------------------------------------------------------------------------------------------------------------------------------------------------------------------------------------------------------------------------------------------------------------------------------------------------------------------------------------------------------------------------------------------------------------------------------------------------------------------------------------------------------------------------------------------------------|

|                                           |                                                                                                        |                                                                                                                                                                                                                                                                                                                                                                                                                                                                                                                                                                                                                                                                                                                                                                                                                                             |
|-------------------------------------------|--------------------------------------------------------------------------------------------------------|---------------------------------------------------------------------------------------------------------------------------------------------------------------------------------------------------------------------------------------------------------------------------------------------------------------------------------------------------------------------------------------------------------------------------------------------------------------------------------------------------------------------------------------------------------------------------------------------------------------------------------------------------------------------------------------------------------------------------------------------------------------------------------------------------------------------------------------------|
| Human I-domain<br>H164I<br>L222N<br>E294P | To clone into pET15b;<br>N-terminal NdeI site;<br>C-terminal 6-glycine<br>linker, 3xFLAG, XhoI<br>site | TTTCATATGGGATCCAACCTACGGCAGCAGCCCCA<br>GAAGTTCCAGAGGCCCTCCGAGGGTGTCTCAAG<br>AGGATAGTGACATTGCCTTCTTGATTGATGGCTCTG<br>GTAGCATCATCCCAATTGACTTTCGGCGGATGAAG<br>GAGTTTGTCTCAACTGTGATGGAGCAATTAATAAAA<br>GTCCAAAACCTTGTTCTCTTTGATGCAGTACTCTGA<br>AGAATTCCGGATTCACCTTACCTTCAAAGAGTTCCA<br>GAACAACCCTAACCCAAGATCACTGGTGAAGCCAA<br>TAACGCAGCTGAATGGGCGGACACACACGGCCACG<br>GGCATCCGCAAAGTGGTACGAGAGCTGTTTAAACAT<br>CACCAACGGAGCCCCGAAAGAATGCCTTTAAGATCC<br>TAGTTGTCATCACGGATGGAGAAAAGTTTGGCGAT<br>CCCTTGGGATATGAGGATGTCATCCCTGAGGCAGA<br>CAGAGAGGGAGTCATTTCGCTACGTCATTGGGGTGG<br>GAGATGCCTTCCGCAGTCCAAAATCCCGCCAAGAG<br>CTTAATACCATCGCATCCAAGCCGCCTCGTGATCAC<br>GTGTTCCAGGTGAATAACTTTGAGGCTCTGAAGAC<br>CATTGAGAACCAGCTTCGGGAGAAGATCTTTGCGG<br>GAGGAGGAGGAGGCGGAGACTACAAAGACCATGA<br>CGGTGATTATAAAGATCATGATATCGATTACAAGG<br>ATGACGATGACAAGTAACTCGAGAAA |
|-------------------------------------------|--------------------------------------------------------------------------------------------------------|---------------------------------------------------------------------------------------------------------------------------------------------------------------------------------------------------------------------------------------------------------------------------------------------------------------------------------------------------------------------------------------------------------------------------------------------------------------------------------------------------------------------------------------------------------------------------------------------------------------------------------------------------------------------------------------------------------------------------------------------------------------------------------------------------------------------------------------------|

---

---

|                                  |                                                                                                        |                                                                                                                                                                                                                                                                                                                                                                                                                                                                                                                                                                                                                                                                                                                                                                                                                                            |
|----------------------------------|--------------------------------------------------------------------------------------------------------|--------------------------------------------------------------------------------------------------------------------------------------------------------------------------------------------------------------------------------------------------------------------------------------------------------------------------------------------------------------------------------------------------------------------------------------------------------------------------------------------------------------------------------------------------------------------------------------------------------------------------------------------------------------------------------------------------------------------------------------------------------------------------------------------------------------------------------------------|
| Human I-domain<br>H164I<br>L222N | To clone into pET15b;<br>N-terminal NdeI site;<br>C-terminal 6-glycine<br>linker, 3xFLAG, XhoI<br>site | TTTCATATGGGATCCAACCTACGGCAGCAGCCCCA<br>GAAGTTCCCAGAGGCCCTCCGAGGGTGTCTCAAG<br>AGGATAGTGACATTGCCTTCTTGATTGATGGCTCTG<br>GTAGCATCATCCCAATTGACTTTCGGCGGATGAAG<br>GAGTTTGTCTCAACTGTGATGGAGCAATTAATAAAA<br>GTCCAAAACCTTGTCTCTTTGATGCAGTACTCTGA<br>AGAATTCCGGATTCACCTTACCTTCAAAGAGTTCCA<br>GAACAACCCTAACCCAAGATCACTGGTGAAGCCAA<br>TAACGCAGCTGAATGGGCGGACACACACGGCCACG<br>GGCATCCGCAAAGTGGTACGAGAGCTGTTTAAACAT<br>CACCAACGGAGCCCCGAAAGAATGCCTTTAAGATCC<br>TAGTTGTCATCACGGATGGAGAAAAGTTTGGCGAT<br>CCCTTGGGATATGAGGATGTCATCCCTGAGGCAGA<br>CAGAGAGGGAGTCATTTCGCTACGTCATTGGGGTGG<br>GAGATGCCTTCCGCAGTGAGAAATCCCGCCAAGAG<br>CTTAATACCATCGCATCCAAGCCGCCTCGTGATCAC<br>GTGTTCCAGGTGAATAACTTTGAGGCTCTGAAGAC<br>CATTGAGAACAGCTTCGGGAGAAGATCTTTGCGG<br>GAGGAGGCGGAGGAGGAGACTACAAAGACCATGA<br>CGGTGATTATAAAGATCATGATATCGATTACAAGG<br>ATGACGATGACAAGTAACTCGAGAAA |
|----------------------------------|--------------------------------------------------------------------------------------------------------|--------------------------------------------------------------------------------------------------------------------------------------------------------------------------------------------------------------------------------------------------------------------------------------------------------------------------------------------------------------------------------------------------------------------------------------------------------------------------------------------------------------------------------------------------------------------------------------------------------------------------------------------------------------------------------------------------------------------------------------------------------------------------------------------------------------------------------------------|

|                                |                                                                                                                                                                |                                                                                                                                                                                                                                                                                                                                                                                                                                                                                                                                                                                                                                                                                                                                                                                                                                           |
|--------------------------------|----------------------------------------------------------------------------------------------------------------------------------------------------------------|-------------------------------------------------------------------------------------------------------------------------------------------------------------------------------------------------------------------------------------------------------------------------------------------------------------------------------------------------------------------------------------------------------------------------------------------------------------------------------------------------------------------------------------------------------------------------------------------------------------------------------------------------------------------------------------------------------------------------------------------------------------------------------------------------------------------------------------------|
| HMH 1<br>chimeric I-<br>domain | Murine residues<br>swapped into human<br>backbone; To clone<br>into pET15b; N-<br>terminal NdeI site; C-<br>terminal 6-glycine<br>linker, 3xFLAG, XhoI<br>site | ATTCGCATATGGGATCCAACCTACTGAGGCCGCC<br>CAGCAGTTCCCAGAGGCCCTCCGAGAATGTCTCA<br>AGAGGATAGTGACATTGCCTTCTTGATTGATGGCTC<br>TGGTAGCATCATCCACATGACTTTCGGCGGATGA<br>AGGAGTTTGTCTCAACTGTGATGGAGCAATTAATA<br>AAGTCCAAAACCTTGTCTCTTTGATGCAGTACTCT<br>GAAGAATCCGGATTCACCTTACCTTCAAAGAGTTC<br>CAGAACAACCCTAACCCAAGATCACTGGTGAAGCC<br>AATAACGCAGCTGCTTGGGCGGACACACACGGCCA<br>CGGGCATCCGCAAAGTGGTACGAGAGCTGTTTAA<br>ATCACCAACGGAGCCCCGAAAGAATGCCTTTAAGAT<br>CCTAGTTGTCATCACGGATGGAGAAAAGTTTGGCG<br>ATCCCTTGGGATATGAGGATGTCATCCCTGAGGCA<br>GACAGAGAGGGAGTCATTTCGCTACGTCATTGGGGT<br>GGGAGATGCCTTCCGCAGTGAGAAATCCCGCCAAG<br>AGCTTAATACCATCGCATCCAAGCCGCCTCGTGAT<br>CACGTGTTCCAGGTGAATAACTTTGAGGCTCTGAA<br>GACCATTGAGAACAGCTTCGGGAGAAGATCTTTG<br>CGGGAGGAGGAGGCGGAGGAGACTACAAAGACCA<br>TGACGGTATTATAAAGATCATGATATCGATTACA<br>AGGATGACGATGACAAGTAACTCGAGTTCGACG |
|--------------------------------|----------------------------------------------------------------------------------------------------------------------------------------------------------------|-------------------------------------------------------------------------------------------------------------------------------------------------------------------------------------------------------------------------------------------------------------------------------------------------------------------------------------------------------------------------------------------------------------------------------------------------------------------------------------------------------------------------------------------------------------------------------------------------------------------------------------------------------------------------------------------------------------------------------------------------------------------------------------------------------------------------------------------|

---

|                                |                                                                                                                                                                |                                                                                                                                                                                                                                                                                                                                                                                                                                                                                                                                                                                                                                                                                                                                                                                                                                                                                                         |
|--------------------------------|----------------------------------------------------------------------------------------------------------------------------------------------------------------|---------------------------------------------------------------------------------------------------------------------------------------------------------------------------------------------------------------------------------------------------------------------------------------------------------------------------------------------------------------------------------------------------------------------------------------------------------------------------------------------------------------------------------------------------------------------------------------------------------------------------------------------------------------------------------------------------------------------------------------------------------------------------------------------------------------------------------------------------------------------------------------------------------|
| HMH 2<br>chimeric I-<br>domain | Murine residues<br>swapped into human<br>backbone; To clone<br>into pET15b; N-<br>terminal NdeI site; C-<br>terminal 6-glycine<br>linker, 3xFLAG, XhoI<br>site | <p> ATTCGCATATGGGATCCAACCTACGGCAGCAGCCC<br/> CAGAAGTTCCCAGAGGGCCCTCCGAGGGTGTCTCA<br/> ACAGGAGAGTGACATTGTCTTCTTGATTGATGGCTC<br/> TGGTAGCATCATCCACATGACTTTCGGCGGATGA<br/> AGGAGTTTGTCTCAACTGTGATGGAGCAATTA<br/> AAA<br/> AAGTCCAAAACCTTGTCTCTTTGATGCAGTACTCT<br/> GAAGAATTCCGGATTCACCTTACCTTCAAAGAGTTC<br/> CAGAACAACCCTAACCCAAGATCACTGGTGAAGCC<br/> AATAACGCAGCTGCTTGGGCGGACACACACGGCCA<br/> CGGGCATCCGCAAAGTGGTACGAGAGCTGTTTCAC<br/> AAAACCAACGGAGCCCGAGAGAATGCCGCGAAGA<br/> TCCTAGTTGTCATCACGGATGGAGAAAAGTTTGGC<br/> GATCCCTTGGGATATGAGGATGTCATCCCTGAGGC<br/> AGACAGAGCAGGAGTCATTTCGCTACGTCATTGGGG<br/> TGGGAGATGCCTTCCGCAGTGAGAAATCCCGCCAA<br/> GAGCTTAATAACCATCGCATCCAAGCCGCCTCGTGA<br/> TCACGTGTTCCAGGTGAATAACTTTGAGGCTCTGA<br/> AGACCATTGAGAACCAGCTTCGGGAGAAGATCTTT<br/> GCGGGAGGAGGAGGCGGAGGAGACTACAAAGACC<br/> ATGACGGTGATTATAAAGATCATGATATCGATTAC<br/> AAGGATGACGATGACAAGTAACTCGAGTCGACG </p>   |
| HMH 3<br>chimeric I-<br>domain | Murine residues<br>swapped into human<br>backbone; To clone<br>into pET15b; N-<br>terminal NdeI site; C-<br>terminal 6-glycine<br>linker, 3xFLAG, XhoI<br>site | <p> ATTCGCATATGGGATCCAACCTACGGCAGCAGCCC<br/> CAGAAGTTCCCAGAGGGCCCTCCGAGGGTGTCTCA<br/> AGAGGATAGTGACATTGCCTTCTTGATTGATGGCTC<br/> TGGTAGCATCAACAACATTGACTTTCAGAAGATGA<br/> AGGAGTTTGTCTCAACTGTGATGGAGCAATTA<br/> AAA<br/> AAGTCCAAAACCTTGTCTCTTTGATGCAGTACTCT<br/> GAAGAATTCCGGATTCACCTTACCTTCAAAGAGTTC<br/> CAGAACAACCCTAACCCAAGATCACTGGTGAAGCC<br/> AATAAAGCAGCTGAATGGGCGGACACACACGGCC<br/> ACGGGCATCCGCAAAGTGGTACGAGAGCTGTTTAA<br/> CATCACC AACGGAGCCCGAAAGAATGCCTTTAAGA<br/> TCCTAGTTGTCATCACGGATGGAGAAAAGTTTGGC<br/> GATCCCTTGGGATATGAGGATGTCATCCCTGAGGC<br/> AGACAGAGAGGGAGTCATTTCGCTACGTCATTGGGG<br/> TGGGAGATGCCTTCCGCAGTGAGAAATCCCGCCAA<br/> GAGCTTAATAACCATCGCATCCAAGCCGCCTCGTGA<br/> TCACGTGTTCCAGGTGAATAACTTTGAGGCTCTGA<br/> AGACCATTGAGAACCAGCTTCGGGAGAAGATCTTT<br/> GCGGGAGGAGGAGGCGGAGGAGACTACAAAGACC<br/> ATGACGGTGATTATAAAGATCATGATATCGATTAC<br/> AAGGATGACGATGACAAGTAACTCGAGTCGACG </p> |

---

|                                |                                                                                                                                                                |                                                                                                                                                                                                                                                                                                                                                                                                                                                                                                                                                                                                                                                                                                                                                                                                                                             |
|--------------------------------|----------------------------------------------------------------------------------------------------------------------------------------------------------------|---------------------------------------------------------------------------------------------------------------------------------------------------------------------------------------------------------------------------------------------------------------------------------------------------------------------------------------------------------------------------------------------------------------------------------------------------------------------------------------------------------------------------------------------------------------------------------------------------------------------------------------------------------------------------------------------------------------------------------------------------------------------------------------------------------------------------------------------|
| HMH 4<br>chimeric I-<br>domain | Murine residues<br>swapped into human<br>backbone; To clone<br>into pET15b; N-<br>terminal NdeI site; C-<br>terminal 6-glycine<br>linker, 3xFLAG, XhoI<br>site | ATTCGCATATGGGATCCAACCTACGGCAGCAGCCC<br>CAGAAGTTCAGAGGGCCCTCCGAGGGTGTCTCA<br>AGAGGATAGTGACATTGCCTTCTTGATTGATGGCTC<br>TGGTAGCATCATCCACATGACTTTCGGCGGATGA<br>AGGAGTTTGTCTCAACTGTGATGGAGCAATTCAAA<br>AAGTCCAAAACCTTGTCTCTTTGATGCAGTACTCT<br>GAAGAATTCCGGATTCACCTTACCTTCAAAGAGTTC<br>CAGAACAACCCTAACCCAAGATCACTGGTGAAGCC<br>AATAACGCAGCTGCTTGGGCGGACACACACGGCCA<br>CGGGCATCCGCAAAGTGGTACGAGAGCTGTTAAC<br>ATCACCAACGGAGCCCGAAAGAATGCCTTTAAGAT<br>CCTAGTTGTCATCACGGATGGAGAAAAGTTTGGCG<br>ATCCCTTGGGATATGAGGATGTCATCCCTGAGGCA<br>GACAGAGAGGGAGTCATTTCGCTACGTCATTGGGGT<br>GGGAGATGCCTTCCGCAGTGAGAAATCCCGCCAAG<br>AGCTTAATACCATCGCATCCAAGCCGCCTCGTGAT<br>CACGTGTTCCAGGTGAATAACTTTGAGGCTCTGAA<br>GACCATTCAGAACCAGCTTCAGGAGAAGATCTTTG<br>CGGGAGGAGGAGGCGGAGGAGACTACAAAGACCA<br>TGACGGTGATTATAAAGATCATGATATCGATTACA<br>AGGATGACGATGACAAGTAACTCGAGTTCGACG |
|--------------------------------|----------------------------------------------------------------------------------------------------------------------------------------------------------------|---------------------------------------------------------------------------------------------------------------------------------------------------------------------------------------------------------------------------------------------------------------------------------------------------------------------------------------------------------------------------------------------------------------------------------------------------------------------------------------------------------------------------------------------------------------------------------------------------------------------------------------------------------------------------------------------------------------------------------------------------------------------------------------------------------------------------------------------|

|                                |                                                                                                                                                                |                                                                                                                                                                                                                                                                                                                                                                                                                                                                                                                                                                                                                                                                                                                                                                                                                                         |
|--------------------------------|----------------------------------------------------------------------------------------------------------------------------------------------------------------|-----------------------------------------------------------------------------------------------------------------------------------------------------------------------------------------------------------------------------------------------------------------------------------------------------------------------------------------------------------------------------------------------------------------------------------------------------------------------------------------------------------------------------------------------------------------------------------------------------------------------------------------------------------------------------------------------------------------------------------------------------------------------------------------------------------------------------------------|
| HMH 5<br>chimeric I-<br>domain | Murine residues<br>swapped into human<br>backbone; To clone<br>into pET15b; N-<br>terminal NdeI site; C-<br>terminal 6-glycine<br>linker, 3xFLAG, XhoI<br>site | ATTCGCATATGGGATCCAACCTACGGCAGCAGCCC<br>CAGAAGTTCAGAGGGCCCTCCGAGGGTGTCTCA<br>AGAGGATAGTGACATTGCCTTCTTGATTGATGGCTC<br>TGGTAGCATCATCCACATGACTTTCGGCGGATGA<br>AGGAGTTTGTCTCAACTGTGATGGAGCAATTA<br>AAGTCCAAAACCTTGTCTCTTTGATGCAGTACTCT<br>GACGAATTCCGGATTCACCTTACCTTCAAAGAGTTC<br>CAGAACAACCCTAACCCAAGATCACTGGTGAAGCC<br>AATAACGCAGCTGCTTGGGCGGACAAAACGGCCT<br>CAGGCATCCGCAAAGTGGTACGAGAGCTGTTAAC<br>ATCACCAACGGAGCCCGAAAGAATGCCTTTAAGAT<br>CCTAGTTGTCATCACGGATGGAGAAAAGTTTGGCG<br>ATCCCTTGGATTATAAGGATGTCATCCCTGAGGCA<br>GACAGAGAGGGAGTCATTTCGCTACGTCATTGGGGT<br>GGGAGATGCCTTCCGCAGTGAGAAATCCCGCCAAG<br>AGCTTAATACCATCGCATCCAAGCCGCCTCGTGAT<br>CACGTGTTCCAGGTGAATAACTTTGAGGCTCTGAA<br>GACCATTCAGAACCAGCTTCGGGAGAAGATCTTTG<br>CGGGAGGAGGAGGCGGAGGAGACTACAAAGACCA<br>TGACGGTGATTATAAAGATCATGATATCGATTACA<br>AGGATGACGATGACAAGTAACTCGAGTTCGACG |
|--------------------------------|----------------------------------------------------------------------------------------------------------------------------------------------------------------|-----------------------------------------------------------------------------------------------------------------------------------------------------------------------------------------------------------------------------------------------------------------------------------------------------------------------------------------------------------------------------------------------------------------------------------------------------------------------------------------------------------------------------------------------------------------------------------------------------------------------------------------------------------------------------------------------------------------------------------------------------------------------------------------------------------------------------------------|

---

|                                |                                                                                                                                                                |                                                                                                                                                                                                                                                                                                                                                                                                                                                                                                                                                                                                                                                                                                                                                                                                                                                                                                      |
|--------------------------------|----------------------------------------------------------------------------------------------------------------------------------------------------------------|------------------------------------------------------------------------------------------------------------------------------------------------------------------------------------------------------------------------------------------------------------------------------------------------------------------------------------------------------------------------------------------------------------------------------------------------------------------------------------------------------------------------------------------------------------------------------------------------------------------------------------------------------------------------------------------------------------------------------------------------------------------------------------------------------------------------------------------------------------------------------------------------------|
| HMH 6<br>chimeric I-<br>domain | Murine residues<br>swapped into human<br>backbone; To clone<br>into pET15b; N-<br>terminal NdeI site; C-<br>terminal 6-glycine<br>linker, 3xFLAG, XhoI<br>site | <p> ATTCGCATATGGGATCCAACCTACGGCAGCAGCCC<br/> CAGAAGTTCCCAGAGGGCCCTCCGAGGGTGTCTCA<br/> AGAGGATAGTGACATTGCCTTCTTGATTGATGGCTC<br/> TGGTAGCATCATCCACATGACTTTCGGCGGATGA<br/> AGGAGTTTGTCTCAACTGTGATGGAGCAATTA<br/> AAA<br/> AAGTCCAAAACCTTGTCTCTTTGATGCAGTACTCT<br/> GAAGAATTCCGGATTCACCTTACCTTCAATGACTTC<br/> AAGAGAAACCCTAGCCCAAGATCACATGTGAAGCC<br/> AATAACGCAGCTGCTTGGGCGGACACACACGGCCA<br/> CGGGCATCCGCAAAGTGGTACGAGAGCTGTTAAC<br/> ATCACCAACGGAGCCCGAAAGAATGCCTTTAAGAT<br/> CCTAGTTGTCATCACGGATGGAGAAAAGTTTGGCG<br/> ATCCCTTGGGATATGAGGATGTCATCCCTGAGGCA<br/> GACAGAGAGGGAGTCATTTCGCTACGTCATTGGGGT<br/> GGGAGATGCCTTCCGCAGTGAGAAATCCCGCCAAG<br/> AGCTTAATACCATCGCATCCAAGCCGCCTCGTGAT<br/> CACGTGTTCCAGGTGAATAACTTTGAGGCTCTGAA<br/> GACCATTCAGAACCAGCTTCGGGAGAAGATCTTTG<br/> CGGGAGGAGGAGGCGGAGGAGACTACAAAGACCA<br/> TGACGGTGATTATAAAGATCATGATATCGATTACA<br/> AGGATGACGATGACAAGTAACTCGAGTTCGACG </p> |
| HMH 7<br>chimeric I-<br>domain | Murine residues<br>swapped into human<br>backbone; To clone<br>into pET15b; N-<br>terminal NdeI site; C-<br>terminal 6-glycine<br>linker, 3xFLAG, XhoI<br>site | <p> ATTCGCATATGGGATCCAACCTACGGCAGCAGCCC<br/> CAGAAGTTCCCAGAGGGCCCTCCGAGGGTGTCTCA<br/> AGAGGATAGTGACATTGCCTTCTTGATTGATGGCTC<br/> TGGTAGCATCATCCACATGACTTTCGGCGGATGA<br/> AGGAGTTTGTCTCAACTGTGATGGAGCAATTA<br/> AAA<br/> AAGTCCAAAACCTTGTCTCTTTGATGCAGTACTCT<br/> GAAGAATTCCGGATTCACCTTACCTTCAAAGAGTTC<br/> CAGAACAACCCTAACCCAAGATCACTGGTGAAGCC<br/> AATAACGCAGCTGCTTGGGCGGACACACACGGCCA<br/> CGGGCATCCGCAAAGTGGTACGAGAGCTGTTAAC<br/> ATCACCAACGGAGCCCGAAAGAATGCCTTTAAGAT<br/> CCTAGTTGTCATCACGGATGGAGAAAAGTTTGGCG<br/> ATCCCTTGGGATATGAGGATGTCATCCCTGAGGCA<br/> GACAGAGAGGGAGTCATTTCGCTACGTCATTGGGGT<br/> GGGAAATGCCTTCAACAAACCACAGTCCCGCAGAG<br/> AGCTTGACACCATCGCATCCAAGCCGGCTGGTGAA<br/> CACGTGTTCCAGGTGGACAACTTTGAGGCTCTGAA<br/> GACCATTCAGAACCAGCTTCGGGAGAAGATCTTTG<br/> CGGGAGGAGGAGGCGGAGGAGACTACAAAGACCA<br/> TGACGGTGATTATAAAGATCATGATATCGATTACA<br/> AGGATGACGATGACAAGTAACTCGAGTTCGACG </p> |

---

|                                |                                                                                                                                                                |                                                                                                                                                                                                                                                                                                                                                                                                                                                                                                                                                                                                                                                                                                                                                                                                                                         |
|--------------------------------|----------------------------------------------------------------------------------------------------------------------------------------------------------------|-----------------------------------------------------------------------------------------------------------------------------------------------------------------------------------------------------------------------------------------------------------------------------------------------------------------------------------------------------------------------------------------------------------------------------------------------------------------------------------------------------------------------------------------------------------------------------------------------------------------------------------------------------------------------------------------------------------------------------------------------------------------------------------------------------------------------------------------|
| MHM 1<br>chimeric I-<br>domain | Human residues<br>swapped into murine<br>backbone; To clone<br>into pET15b; N-<br>terminal NdeI site; C-<br>terminal 6-glycine<br>linker, 3xFLAG, XhoI<br>site | ATTCGCATATGGGCTCCAACCTGCGGCAGCAGCCC<br>CAGAAGTCCCAGAGGCTCTCAGAGGGTGTCTCA<br>GCAGGAGAGTGACATTGTCTTCTTGATTGATGGCTC<br>CGGTAGCATCAACAACATTGACTTTCAGAAGATGA<br>AGGAGTTTGTCTCAACTGTGATGGAGCAGTTCAAA<br>AAGTCTAAAACCTTGTCTCTTTGATGCAGTACTCG<br>GACGAGTCCGGATTCACTTCACCTTCAATGACTTC<br>AAGAGAAACCTAGCCCAAGATCACATGTGAGCCC<br>CATAAAGCAGCTGAATGGGAGGACAAAACTGCCT<br>CAGGGATCCGGAAAGTAGTGAGAGAACTGTTTAC<br>AAAACCAATGGGGCCCGGAGAATGCTGCGAAGA<br>TCCTAGTTGTCATCACAGATGGAGAAAAATTCGGT<br>GATCCCTTGATTATAAGGATGTCATCCCCGAGGC<br>AGACAGAGCAGGGGTCAATTCGCTACGTAATTGGGG<br>TGGGAAATGCCTTCAACAAACCACAGTCCCGCAGA<br>GAGCTCGACACCATCGCATCTAAGCCAGCTGGTGA<br>ACACGTGTTCCAAGTGGACAACCTTTGAAGCCCTGA<br>ATACCATTCAGAACCAGCTTCAGGAAAAGATCTTT<br>GCAGGAGGAGGCGGAGGAGGAGACTACAAAGACC<br>ATGACGGTGATTATAAAGATCATGATATCGATTAC<br>AAGGATGACGATGACAAGTAACTCGAGTCGACG |
|--------------------------------|----------------------------------------------------------------------------------------------------------------------------------------------------------------|-----------------------------------------------------------------------------------------------------------------------------------------------------------------------------------------------------------------------------------------------------------------------------------------------------------------------------------------------------------------------------------------------------------------------------------------------------------------------------------------------------------------------------------------------------------------------------------------------------------------------------------------------------------------------------------------------------------------------------------------------------------------------------------------------------------------------------------------|

|                                |                                                                                                                                                                |                                                                                                                                                                                                                                                                                                                                                                                                                                                                                                                                                                                                                                                                                                                                                                                                                                          |
|--------------------------------|----------------------------------------------------------------------------------------------------------------------------------------------------------------|------------------------------------------------------------------------------------------------------------------------------------------------------------------------------------------------------------------------------------------------------------------------------------------------------------------------------------------------------------------------------------------------------------------------------------------------------------------------------------------------------------------------------------------------------------------------------------------------------------------------------------------------------------------------------------------------------------------------------------------------------------------------------------------------------------------------------------------|
| MHM 2<br>chimeric I-<br>domain | Human residues<br>swapped into murine<br>backbone; To clone<br>into pET15b; N-<br>terminal NdeI site; C-<br>terminal 6-glycine<br>linker, 3xFLAG, XhoI<br>site | ATTCGCATATGGGCTCCAACCTGCTGAGGCCGCC<br>CAGCAGTCCCAGAGGCTCTCAGAGAATGTCTCA<br>GGAGGATAGTGACATTGCCTTCTTGATTGATGGCTC<br>CGGTAGCATCAACAACATTGACTTTCAGAAGATGA<br>AGGAGTTTGTCTCAACTGTGATGGAGCAGTTCAAA<br>AAGTCTAAAACCTTGTCTCTTTGATGCAGTACTCG<br>GACGAGTCCGGATTCACTTCACCTTCAATGACTTC<br>AAGAGAAACCTAGCCCAAGATCACATGTGAGCCC<br>CATAAAGCAGCTGAATGGGAGGACAAAACTGCCT<br>CAGGGATCCGGAAAGTAGTGAGAGAACTGTTTAA<br>ATCACCAATGGGGCCCGGAAGAATGCTTTTAAAGAT<br>CCTAGTTGTCATCACAGATGGAGAAAAATTCGGTG<br>ATCCCTTGATTATAAGGATGTCATCCCCGAGGCA<br>GACAGAGAGGGGGTCAATTCGCTACGTAATTGGGGT<br>GGGAAATGCCTTCAACAAACCACAGTCCCGCAGAG<br>AGCTCGACACCATCGCATCTAAGCCAGCTGGTGAA<br>CACGTGTTCCAAGTGGACAACCTTTGAAGCCCTGAA<br>TACCATTCAGAACCAGCTTCAGGAAAAGATCTTTG<br>CAGGAGGAGGAGGCGGAGGAGACTACAAAGACCA<br>TGACGGTGATTATAAAGATCATGATATCGATTACA<br>AGGATGACGATGACAAGTAACTCGAGTCGACG |
|--------------------------------|----------------------------------------------------------------------------------------------------------------------------------------------------------------|------------------------------------------------------------------------------------------------------------------------------------------------------------------------------------------------------------------------------------------------------------------------------------------------------------------------------------------------------------------------------------------------------------------------------------------------------------------------------------------------------------------------------------------------------------------------------------------------------------------------------------------------------------------------------------------------------------------------------------------------------------------------------------------------------------------------------------------|

---

---

|                                |                                                                                                                                                                |                                                                                                                                                                                                                                                                                                                                                                                                                                                                                                                                                                                                                                                                                                                                                                                                                                              |
|--------------------------------|----------------------------------------------------------------------------------------------------------------------------------------------------------------|----------------------------------------------------------------------------------------------------------------------------------------------------------------------------------------------------------------------------------------------------------------------------------------------------------------------------------------------------------------------------------------------------------------------------------------------------------------------------------------------------------------------------------------------------------------------------------------------------------------------------------------------------------------------------------------------------------------------------------------------------------------------------------------------------------------------------------------------|
| MHM 3<br>chimeric I-<br>domain | Human residues<br>swapped into murine<br>backbone; To clone<br>into pET15b; N-<br>terminal NdeI site; C-<br>terminal 6-glycine<br>linker, 3xFLAG, XhoI<br>site | ATTCGCATATGGGCTCCAACCTGCTGAGGCCGCC<br>CAGCAGTTCCCAGAGGCTCTCAGAGAATGTCCTCA<br>GCAGGAGAGTGACATTGTCTTCTTGATTGATGGCTC<br>CGGTAGCATCATCCACATGACTTTCGGCGGATGA<br>AGGAGTTTGTCTCAACTGTGATGGAGCAGTTCAAA<br>AAGTCTAAAACCTTGTCTCTTTGATGCAGTACTCG<br>GACGAGTTCCGGATTCACTTCACCTTCAATGACTTC<br>AAGAGAAACCTAGCCCAAGATCACATGTGAAGCC<br>CATAACGCAGCTGCTTGGGAGGACAAAACTGCCT<br>CAGGGATCCGAAAGTAGTGAGAGAACTGTTTAC<br>AAAACCAATGGGGCCCCGGGAGAATGCTGCGAAGA<br>TCCTAGTTGTCATCACAGATGGAGAAAAATTCCGGT<br>GATCCCTTGGATTATAAGGATGTCATCCCCGAGGC<br>AGACAGAGCAGGGGTCATTTCGCTACGTAATTGGGG<br>TGGGAAATGCCTTCAACAAACCACAGTCCC GCAGA<br>GAGCTCGACACCATCGCATCTAAGCCAGCTGGTGA<br>ACACGTGTTCCAAGTGGACAACCTTTGAAGCCCTGA<br>ATACCATTCAGAACCAGCTTCAGGAAAAGATCTTT<br>GCAGGAGGAGGAGGCGGAGGAGACTACAAAGACC<br>ATGACGGTGATTATAAAGATCATGATATCGATTAC<br>AAGGATGACGATGACAAGTAACTCGAGTCGACG |
|--------------------------------|----------------------------------------------------------------------------------------------------------------------------------------------------------------|----------------------------------------------------------------------------------------------------------------------------------------------------------------------------------------------------------------------------------------------------------------------------------------------------------------------------------------------------------------------------------------------------------------------------------------------------------------------------------------------------------------------------------------------------------------------------------------------------------------------------------------------------------------------------------------------------------------------------------------------------------------------------------------------------------------------------------------------|

|                                |                                                                                                                                                                |                                                                                                                                                                                                                                                                                                                                                                                                                                                                                                                                                                                                                                                                                                                                                                                                                                               |
|--------------------------------|----------------------------------------------------------------------------------------------------------------------------------------------------------------|-----------------------------------------------------------------------------------------------------------------------------------------------------------------------------------------------------------------------------------------------------------------------------------------------------------------------------------------------------------------------------------------------------------------------------------------------------------------------------------------------------------------------------------------------------------------------------------------------------------------------------------------------------------------------------------------------------------------------------------------------------------------------------------------------------------------------------------------------|
| MHM 4<br>chimeric I-<br>domain | Human residues<br>swapped into murine<br>backbone; To clone<br>into pET15b; N-<br>terminal NdeI site; C-<br>terminal 6-glycine<br>linker, 3xFLAG, XhoI<br>site | ATTCGCATATGGGCTCCAACCTGCTGAGGCCGCC<br>CAGCAGTTCCCAGAGGCTCTCAGAGAATGTCCTCA<br>GCAGGAGAGTGACATTGTCTTCTTGATTGATGGCTC<br>CGGTAGCATCAACAACATTGACTTTCAGAAGATGA<br>AGGAGTTTGTCTCAACTGTGATGGAGCAGTTAAAA<br>AAGTCTAAAACCTTGTCTCTTTGATGCAGTACTCG<br>GACGAGTTCCGGATTCACTTCACCTTCAATGACTTC<br>AAGAGAAACCTAGCCCAAGATCACATGTGAGCCC<br>CATAAAGCAGCTGAATGGGAGGACAAAACTGCCT<br>CAGGGATCCGAAAGTAGTGAGAGAACTGTTTAC<br>AAAACCAATGGGGCCCCGGGAGAATGCTGCGAAGA<br>TCCTAGTTGTCATCACAGATGGAGAAAAATTCCGGT<br>GATCCCTTGGATTATAAGGATGTCATCCCCGAGGC<br>AGACAGAGCAGGGGTCATTTCGCTACGTAATTGGGG<br>TGGGAAATGCCTTCAACAAACCACAGTCCC GCAGA<br>GAGCTCGACACCATCGCATCTAAGCCAGCTGGTGA<br>ACACGTGTTCCAAGTGGACAACCTTTGAAGCCCTGA<br>ATACCATTCAGAACCAGCTTCGGGAAAAGATCTTT<br>GCAGGAGGAGGAGGCGGAGGAGACTACAAAGACC<br>ATGACGGTGATTATAAAGATCATGATATCGATTAC<br>AAGGATGACGATGACAAGTAACTCGAGTCGACG |
|--------------------------------|----------------------------------------------------------------------------------------------------------------------------------------------------------------|-----------------------------------------------------------------------------------------------------------------------------------------------------------------------------------------------------------------------------------------------------------------------------------------------------------------------------------------------------------------------------------------------------------------------------------------------------------------------------------------------------------------------------------------------------------------------------------------------------------------------------------------------------------------------------------------------------------------------------------------------------------------------------------------------------------------------------------------------|

---



---

|                                |                                                                                                                                                                |                                                                                                                                                                                                                                                                                                                                                                                                                                                                                                                                                                                                                                                                                                                                                                                                                                               |
|--------------------------------|----------------------------------------------------------------------------------------------------------------------------------------------------------------|-----------------------------------------------------------------------------------------------------------------------------------------------------------------------------------------------------------------------------------------------------------------------------------------------------------------------------------------------------------------------------------------------------------------------------------------------------------------------------------------------------------------------------------------------------------------------------------------------------------------------------------------------------------------------------------------------------------------------------------------------------------------------------------------------------------------------------------------------|
| MHM 5<br>chimeric I-<br>domain | Human residues<br>swapped into murine<br>backbone; To clone<br>into pET15b; N-<br>terminal NdeI site; C-<br>terminal 6-glycine<br>linker, 3xFLAG, XhoI<br>site | ATTCGCATATGGGCTCCAACCTGCTGAGGCCGCC<br>CAGCAGTTCCCAGAGGCTCTCAGAGAATGTCCTCA<br>GCAGGAGAGTGACATTGTCTTCTTGATTGATGGCTC<br>CGGTAGCATCAACAACATTGACTTTCAGAAGATGA<br>AGGAGTTTGTCTCAACTGTGATGGAGCAGTTCAAA<br>AAGTCTAAAACCTTGTTCTCTTTGATGCAGTACTCG<br>GAAGAGTTCCGGATTCACTTCACCTTCAATGACTTC<br>AAGAGAAACCTAGCCCAAGATCACATGTGAGCCC<br>CATAAAGCAGCTGAATGGGAGGACACACTGCCA<br>CGGGGATCCGGAAAGTAGTGAGAGAACTGTTTAC<br>AAAACCAATGGGGCCCCGGGAGAATGCTGCGAAGA<br>TCCTAGTTGTCATCACAGATGGAGAAAATTTCGGT<br>GATCCCTTGGGATATGAGGATGTCATCCCCGAGGC<br>AGACAGAGCAGGGGTCATTTCGCTACGTAATTGGGG<br>TGGGAAATGCCTTCAACAAACCACAGTCCC GCAGA<br>GAGCTCGACACCATCGCATCTAAGCCAGCTGGTGA<br>ACACGTGTTCCAAGTGGACAACCTTTGAAGCCCTGA<br>ATACCATTCAGAACCAGCTTCAGGAAAAGATCTTT<br>GCAGGAGGAGGAGGCGGAGGAGACTACAAAGACC<br>ATGACGGTGATTATAAAGATCATGATATCGATTAC<br>AAGGATGACGATGACAAGTAACTCGAGTCGACG |
|--------------------------------|----------------------------------------------------------------------------------------------------------------------------------------------------------------|-----------------------------------------------------------------------------------------------------------------------------------------------------------------------------------------------------------------------------------------------------------------------------------------------------------------------------------------------------------------------------------------------------------------------------------------------------------------------------------------------------------------------------------------------------------------------------------------------------------------------------------------------------------------------------------------------------------------------------------------------------------------------------------------------------------------------------------------------|

|                                |                                                                                                                                                                |                                                                                                                                                                                                                                                                                                                                                                                                                                                                                                                                                                                                                                                                                                                                                                                                                                                 |
|--------------------------------|----------------------------------------------------------------------------------------------------------------------------------------------------------------|-------------------------------------------------------------------------------------------------------------------------------------------------------------------------------------------------------------------------------------------------------------------------------------------------------------------------------------------------------------------------------------------------------------------------------------------------------------------------------------------------------------------------------------------------------------------------------------------------------------------------------------------------------------------------------------------------------------------------------------------------------------------------------------------------------------------------------------------------|
| MHM 6<br>chimeric I-<br>domain | Human residues<br>swapped into murine<br>backbone; To clone<br>into pET15b; N-<br>terminal NdeI site; C-<br>terminal 6-glycine<br>linker, 3xFLAG, XhoI<br>site | ATTCGCATATGGGCTCCAACCTGCTGAGGCCGCC<br>CAGCAGTTCCCAGAGGCTCTCAGAGAATGTCCTCA<br>GCAGGAGAGTGACATTGTCTTCTTGATTGATGGCTC<br>CGGTAGCATCAACAACATTGACTTTCAGAAGATGA<br>AGGAGTTTGTCTCAACTGTGATGGAGCAGTTCAAA<br>AAGTCTAAAACCTTGTTCTCTTTGATGCAGTACTCG<br>GACGAGTTCCGGATTCACTTCACCTTCAAAGAGTTC<br>CAGAACAACCTAACC CAAGATCACTGGTGAGCCC<br>CATAAAGCAGCTGAATGGGAGGACAAAACTGCCT<br>CAGGGATCCGGAAAGTAGTGAGAGAACTGTTTAC<br>AAAACCAATGGGGCCCCGGGAGAATGCTGCGAAGA<br>TCCTAGTTGTCATCACAGATGGAGAAAATTTCGGT<br>GATCCCTTGGATTATAAGGATGTCATCCCCGAGGC<br>AGACAGAGCAGGGGTCATTTCGCTACGTAATTGGGG<br>TGGGAAATGCCTTCAACAAACCACAGTCCC GCAGA<br>GAGCTCGACACCATCGCATCTAAGCCAGCTGGTGA<br>ACACGTGTTCCAAGTGGACAACCTTTGAAGCCCTGA<br>ATACCATTCAGAACCAGCTTCAGGAAAAGATCTTT<br>GCAGGAGGAGGAGGCGGAGGAGACTACAAAGACC<br>ATGACGGTGATTATAAAGATCATGATATCGATTAC<br>AAGGATGACGATGACAAGTAACTCGAGTCGACG |
|--------------------------------|----------------------------------------------------------------------------------------------------------------------------------------------------------------|-------------------------------------------------------------------------------------------------------------------------------------------------------------------------------------------------------------------------------------------------------------------------------------------------------------------------------------------------------------------------------------------------------------------------------------------------------------------------------------------------------------------------------------------------------------------------------------------------------------------------------------------------------------------------------------------------------------------------------------------------------------------------------------------------------------------------------------------------|

---

---

|                                |                                                                                                                                                                |                                                                                                                                                                                                                                                                                                                                                                                                                                                                                                                                                                                                                                                                                                                                                                                                                                           |
|--------------------------------|----------------------------------------------------------------------------------------------------------------------------------------------------------------|-------------------------------------------------------------------------------------------------------------------------------------------------------------------------------------------------------------------------------------------------------------------------------------------------------------------------------------------------------------------------------------------------------------------------------------------------------------------------------------------------------------------------------------------------------------------------------------------------------------------------------------------------------------------------------------------------------------------------------------------------------------------------------------------------------------------------------------------|
| MHM 7<br>chimeric I-<br>domain | Human residues<br>swapped into murine<br>backbone; To clone<br>into pET15b; N-<br>terminal NdeI site; C-<br>terminal 6-glycine<br>linker, 3xFLAG, XhoI<br>site | ATTCGCATATGGGCTCCAACCTGCTGAGGCCGCC<br>CAGCAGTTCCCAGAGGCTCTCAGAGAATGTCCTCA<br>GCAGGAGAGTGACATTGTCTTCTTGATTGATGGCTC<br>CGGTAGCATCAACAACATTGACTTTCAGAAGATGA<br>AGGAGTTTGTCTCAACTGTGATGGAGCAGTTCAAA<br>AAGTCTAAAACCTTGTCTCTTTGATGCAGTACTCG<br>GACGAGTTCCGGATTCACTTCACCTTCAATGACTTC<br>AAGAGAAACCTAGCCCAAGATCACATGTGAGCCC<br>CATAAAGCAGCTGAATGGGAGGACAAAACTGCCT<br>CAGGGATCCGAAAGTAGTGAGAGAACTGTTTAC<br>AAAACCAATGGGGCCCGGAGAATGCTGCGAAGA<br>TCCTAGTTGTCATCACAGATGGAGAAAAATTCCGGT<br>GATCCCTTGGATTATAAGGATGTCATCCCCGAGGC<br>AGACAGAGCAGGGGTCATTTCGCTACGTAATTGGGG<br>TGGGAGATGCCTTCCGCAGTGAGAAATCCCGCCAA<br>GAGCTCAATACCATCGCATCTAAGCCACCTCGTGA<br>TCACGTGTTCCAAGTGAATAACTTTGAAGCCCTGA<br>ATACCATTCAGAACCAGCTTCAGGAAAAGATCTTT<br>GCAGGAGGAGGAGGCGGAGGAGACTACAAAGACC<br>ATGACGGTGATTATAAAGATCATGATATCGATTAC<br>AAGGATGACGATGACAAGTAACTCGAGTCGACG |
|--------------------------------|----------------------------------------------------------------------------------------------------------------------------------------------------------------|-------------------------------------------------------------------------------------------------------------------------------------------------------------------------------------------------------------------------------------------------------------------------------------------------------------------------------------------------------------------------------------------------------------------------------------------------------------------------------------------------------------------------------------------------------------------------------------------------------------------------------------------------------------------------------------------------------------------------------------------------------------------------------------------------------------------------------------------|

|                                                 |                                                                                                                                                                |                                                                                                                                                                                                                                                                                                                                                                                                                                                                                                                                                                                                                                                                                                                                                                                                                                            |
|-------------------------------------------------|----------------------------------------------------------------------------------------------------------------------------------------------------------------|--------------------------------------------------------------------------------------------------------------------------------------------------------------------------------------------------------------------------------------------------------------------------------------------------------------------------------------------------------------------------------------------------------------------------------------------------------------------------------------------------------------------------------------------------------------------------------------------------------------------------------------------------------------------------------------------------------------------------------------------------------------------------------------------------------------------------------------------|
| MHM <sup>292-295</sup><br>chimeric I-<br>domain | Human residues<br>swapped into murine<br>backbone; To clone<br>into pET15b; N-<br>terminal NdeI site; C-<br>terminal 6-glycine<br>linker, 3xFLAG, XhoI<br>site | ATTCGCATATGGGCTCCAACCTGCTGAGGCCGCC<br>CAGCAGTTCCCAGAGGCTCTCAGAGAATGTCCTCA<br>GCAGGAGAGTGACATTGTCTTCTTGATTGATGGCTC<br>CGGTAGCATCAACAACATTGACTTTCAGAAGATGA<br>AGGAGTTTGTCTCAACTGTGATGGAGCAGTTCAAA<br>AAGTCTAAAACCTTGTCTCTTTGATGCAGTACTCG<br>GACGAGTTCCGGATTCACTTCACCTTCAATGACTTC<br>AAGAGAAACCTAGCCCAAGATCACATGTGAGCCC<br>CATAAAGCAGCTGAATGGGAGGACAAAACTGCCT<br>CAGGGATCCGAAAGTAGTGAGAGAACTGTTTAC<br>AAAACCAATGGGGCCCGGAGAATGCTGCGAAGA<br>TCCTAGTTGTCATCACAGATGGAGAAAAATTCCGGT<br>GATCCCTTGGATTATAAGGATGTCATCCCCGAGGC<br>AGACAGAGCAGGGGTCATTTCGCTACGTAATTGGGG<br>TGGGAAATGCCTTCCGCAGTGAGAAATCCCGCAGA<br>GAGCTCGACACCATCGCATCTAAGCCAGCTGGTGA<br>ACACGTGTTCCAAGTGGACAACCTTTGAAGCCCTGA<br>ATACCATTCAGAACCAGCTTCAGGAAAAGATCTTT<br>GCAGGAGGAGGAGGCGGAGGAGACTACAAAGACC<br>ATGACGGTGATTATAAAGATCATGATATCGATTAC<br>AAGGATGACGATGACAAGTAACTCGAGTCGACG |
|-------------------------------------------------|----------------------------------------------------------------------------------------------------------------------------------------------------------------|--------------------------------------------------------------------------------------------------------------------------------------------------------------------------------------------------------------------------------------------------------------------------------------------------------------------------------------------------------------------------------------------------------------------------------------------------------------------------------------------------------------------------------------------------------------------------------------------------------------------------------------------------------------------------------------------------------------------------------------------------------------------------------------------------------------------------------------------|

---

|                                                     |                                                                                                                                                                                                                                                                                                                                                                                                                                                                                                                                                                                                                                                                                                                                                                                                                                                                     |                                                                                                                                                                                                                                                                                                                                                                                                                                                                                                                                                                                                                                                                                                                                                                                                                                                                                          |
|-----------------------------------------------------|---------------------------------------------------------------------------------------------------------------------------------------------------------------------------------------------------------------------------------------------------------------------------------------------------------------------------------------------------------------------------------------------------------------------------------------------------------------------------------------------------------------------------------------------------------------------------------------------------------------------------------------------------------------------------------------------------------------------------------------------------------------------------------------------------------------------------------------------------------------------|------------------------------------------------------------------------------------------------------------------------------------------------------------------------------------------------------------------------------------------------------------------------------------------------------------------------------------------------------------------------------------------------------------------------------------------------------------------------------------------------------------------------------------------------------------------------------------------------------------------------------------------------------------------------------------------------------------------------------------------------------------------------------------------------------------------------------------------------------------------------------------------|
| <p>MHM<sup>289, 298-316</sup> chimeric I-domain</p> | <p>Human residues swapped into murine backbone; To clone into pET15b; N-terminal NdeI site; C-terminal 6-glycine linker, 3xFLAG, XhoI site</p>                                                                                                                                                                                                                                                                                                                                                                                                                                                                                                                                                                                                                                                                                                                      | <p>ATTCGCATATGGGCTCCAACCTGCTGAGGCCGCC<br/> CAGCAGTTCCCAGAGGCTCTCAGAGAATGTCCTCA<br/> GCAGGAGAGTGACATTGTCTTCTTGATTGATGGCTC<br/> CGGTAGCATCAACAACATTGACTTTCAGAAGATGA<br/> AGGAGTTTGTCTCAACTGTGATGGAGCAGTTCAAA<br/> AAGTCTAAAACCTTGTCTCTTTGATGCAGTACTCG<br/> GACGAGTTCCGGATTCACTTCACCTTCAATGACTTC<br/> AAGAGAAACCTAGCCCAAGATCACATGTGAGCCC<br/> CATAAAGCAGCTGAATGGGAGGACAAAACTGCCT<br/> CAGGGATCCGAAAGTAGTGAGAGAACTGTTTAC<br/> AAAACCAATGGGGCCCGGAGAATGCTGCGAAGA<br/> TCCTAGTTGTCATCACAGATGGAGAAAAATTCCGGT<br/> GATCCCTTGGATTATAAGGATGTCATCCCCGAGGC<br/> AGACAGAGCAGGGGTCATTTCGCTACGTAATTGGGG<br/> TGGGAGATGCCTTCAACAAACCACAGTCCCGCCAA<br/> GAGCTCAATACCATCGCATCTAAGCCACCTCGTGA<br/> TCACGTGTTCCAAGTGAATAACTTTGAAGCCCTGA<br/> ATACCATTCAGAACCAGCTTCAGGAAAAGATCTTT<br/> GCAGGAGGAGGAGGCGGAGGAGACTACAAAGACC<br/> ATGACGGTGATTATAAAGATCATGATATCGATTAC<br/> AAGGATGACGATGACAAGTAACTCGAGTCGACG</p> |
| <p>Humanized CD11b CRISPR/Cas 9 Repair Template</p> | <p>GGAATATCTTTTGCTGGAGAGATGTCAGCTTCCTAC<br/> CAGATGGATGATGGATGACATGACAGATGGATGGC<br/> CATCTGGAGATCAAATTGCTCCCTGTGCTATGTACA<br/> ACCTGCCTAACTGTCCCAACAGCCCTGTTCTAAGC<br/> TGCCTTCTGCTGAACTCTCTATTGGACAGAAAAAGT<br/> TTCAGATTCTTTCATCAAGGCATTTTCTTTGCTACA<br/> TGGGGCTGCTACCATCAGAGAATATATAATTTAGC<br/> TTTGGCTCCTTGGCAACAGGTGGGAGATGCCTTCC<br/> GCAGTGAGAAATCCCGCCAAGAGCTCAATACCATC<br/> GCATCTAAGCCACCTCGAGATCACGTGTTCCAAGT<br/> GAATAACTTTGAAGCCCTGAATACCATTGAGAACC<br/> AGCTTCAGGAAAAGATCTTTGCAATTGAGGGTGAG<br/> ACAGCCCAGTCCGGACCAGCAGTTCCTACTTAGCA<br/> TCCGTACCCCAGCATCAGCTTATCTCCAGACATTTG<br/> GGTCTGACTTGCTCCATCCCTTTGAAATAAGCAA<br/> GCTAGATTTTTGTCTCTAATTATCAGATCTAGACTA<br/> TAGGATGATTAACTGTAGCACAGTGGATTTAAAT<br/> CCTACACAATATATACCAAAAAATTTATATGTGCT<br/> ATGAGCACTGGTTGACTTAGTCATGTCTCCTCTGCC<br/> TAGCATAGTGTGTTCTACAGAGAAATGTCCAAAAT<br/> TTT</p> |                                                                                                                                                                                                                                                                                                                                                                                                                                                                                                                                                                                                                                                                                                                                                                                                                                                                                          |
